# Supplementary material for: Global, regional and national burden of chronic obstructive pulmonary disease over a 30‐year period: Estimates from the 1990 to 2019 Global Burden of Disease Study
Source: PubMed Central journal article supplement (PMC10087739; doi:10.1111/resp.14349), 2022-08-23

## Supplementary Materials

**Supplementary Table S1** Three countries with the largest and lowest number of incidence, death, or DALY.

**Supplementary Figure S1** The incident cases (A), age-standardized incidence (B), death (C) and DALY (D) rates of chronic obstructive pulmonary disease between 1990 and 2019 among sexes.

**Supplementary Figure S2** The EAPC of chronic obstructive pulmonary disease ASR from 1990 to 2019, by sex and region.

**Note:** A: The EAPC of ASIR; B: The EAPC of ASDR; C: The EAPC of age-standardized DALY rate.

**Supplementary Figure S3** The correlation between EAPC and Chronic Obstructive Pulmonary Disease ASR (incidence (a), death (c), and DALY (e)) in 1990 and HDI (incidence (b), death (d), and DALY (f)) in 2019.

**Note:** The circles represent countries that were available on SDI data. The size of circle represents the number of Chronic Obstructive Pulmonary Disease patients. The  $\rho$  indices Pearson's correlation coefficient and p values were derived from Pearson's correlation analysis. ASR, age-standardized incidence/death/DALY rate; EAPC, estimated annual percentage change; SDI, socio-demographic index

**Supplementary Figure S4** The proportion of different ages in chronic obstructive pulmonary disease incidence (A) and death (B) by years.

**Supplementary Figure S5** The global EAPC of chronic obstructive pulmonary disease for both sexes in 204 countries.

**Note:** A: The EAPC of ASIR; B: The EAPC of ASDR; C: The EAPC of age-standardized DALY rate.

**Supplementary Figure S6** The global EAPC of chronic obstructive pulmonary disease for Female in 204 countries.

**Note:** A: The EAPC of ASIR; B: The EAPC of ASDR; C: The EAPC of age-standardized DALY rate.

**Supplementary Figure S7** The global EAPC of chronic obstructive pulmonary disease for male in 204 countries.

**Note:** A: The EAPC of ASIR; B: The EAPC of ASDR; C: The EAPC of age-standardized DALY rate.

**Supplementary Figure S8** The global disease burden of chronic obstructive pulmonary disease for Female in 204 countries.

**Note:** A: The ASIR of Chronic Obstructive Pulmonary Disease in 2019; B: The ASDR of chronic obstructive pulmonary disease in 2019; C: The age-standardized DALY rate of chronic obstructive pulmonary disease in 2019. ASIR: age-standardized incidence rate; ASDR: age-standardized death rate.

**Supplementary Figure S9** The global disease burden of chronic obstructive pulmonary disease for male in 204 countries.

**Note:** A: The ASIR of chronic obstructive pulmonary disease in 2019; B: The ASDR of chronic obstructive pulmonary disease in 2019; C: The age-standardized DALY rate of chronic obstructive pulmonary disease in 2019. ASIR: age-standardized incidence rate; ASDR: age-standardized death rate.

**Supplementary Figure S10** Causes of deaths risk for Female in global (A), high SDI (B), high-middle SDI (C), middle SDI (D), middle-low SDI (E) and low SDI (F).

**Note:** SDI, socio-demographic index.

**Supplementary Figure S11** Causes of deaths risk for male in global (A), high SDI (B), high-middle SDI (C), middle SDI (D), middle-low SDI (E) and low SDI (F).

**Note:** SDI, socio-demographic index.

**Supplementary Figure S12** The ratio of male to female ASDR among different age groups in global (A), high SDI (B), high-middle SDI (C), middle SDI (D), middle-low SDI (E) and low SDI (F).

**Note:** SDI, socio-demographic index. ASDR, age-standardized death rate.

**Supplementary Figure S13** Causes of DALYs risk for Female in global (A), high SDI (B), high-middle SDI (C), middle SDI (D), middle-low SDI (E) and low SDI (F).

**Note:** SDI, socio-demographic index.

**Supplementary Figure S14** Causes of DALYs risk for male in global (A), high SDI (B), high-middle SDI (C), middle SDI (D), middle-low SDI (E) and low SDI (F).

**Note:** SDI, socio-demographic index.

**Supplementary Figure S15** The incidence, death, and DALY rates of Chronic Obstructive Pulmonary Disease in different age groups.

**Note:** A: Incidence in 1990. B: Incidence in 2019. C: Death rate in 1990. D: Death rate in 2019. E: DALY rate in 1990. F: DALY rate in 2019.

**Supplementary Figure S16** The ratio of male to female age-standardized DALY rate among different age groups in global (A), high SDI (B), high-middle SDI (C), middle SDI (D), middle-low SDI (E) and low SDI (F).

**Note:** SDI, socio-demographic index.

**Supplementary Table S1** Three countries with the largest and lowest number of incidence, death, or DALY.

| Measure                            | Sex    | Top three countries      |                                               |                                               | Bottom three countries     |                                         |                             |
|------------------------------------|--------|--------------------------|-----------------------------------------------|-----------------------------------------------|----------------------------|-----------------------------------------|-----------------------------|
| <b>2019ASR(per 100,000 people)</b> |        |                          |                                               |                                               |                            |                                         |                             |
| <b>ASIR</b>                        |        |                          |                                               |                                               |                            |                                         |                             |
|                                    | Both   | Papua New Guinea(341.01) | Democratic People's Republic of Korea(317.05) | Myanmar(306.74)                               | Kuwait(54.48)              | Iraq(58.80)                             | Antigua and Barbuda(61.95)  |
|                                    | Female | Papua New Guinea(327.20) | Democratic People's Republic of Korea(319.93) | Denmark(305.15)                               | Trinidad and Tobago(40.61) | Saint Vincent and the Grenadines(40.99) | Kuwait(41.46)               |
|                                    | Male   | Papua New Guinea(355.62) | Myanmar(326.80)                               | Democratic People's Republic of Korea(319.00) | Burkina Faso(89.46)        | Turkmenistan(89.93)                     | Grenada(90.92)              |
| <b>ASDR</b>                        |        |                          |                                               |                                               |                            |                                         |                             |
|                                    | Both   | Nepal(182.48)            | Papua New Guinea(145.04)                      | Democratic People's Republic of Korea(105.20) | Japan(7.41)                | Barbados(8.27)                          | Kuwait(8.35)                |
|                                    | Female | Nepal(168.43)            | Papua New Guinea(131.67)                      | Bhutan(105.98)                                | Japan(3.98)                | Bermuda(4.38)                           | Montenegro(4.48)            |
|                                    | Male   | Nepal(198.53)            | Papua New Guinea(159.70)                      | Democratic People's Republic of Korea(149.90) | Peru(10.38)                | Kuwait(10.84)                           | Antigua and Barbuda(11.78)  |
| <b>Age Standardized DALY Rate</b>  |        |                          |                                               |                                               |                            |                                         |                             |
|                                    | Both   | Nepal(3318.41)           | Papua New Guinea(2902.74)                     | Solomon Islands(2178.62)                      | Barbados(177.68)           | Antigua and Barbuda(178.16)             | Peru(189.63)                |
|                                    | Female | Nepal(3126.90)           | Papua New Guinea(2902.74)                     | Bhutan(2008.19)                               | Bermuda(113.47)            | Japan(122.44)                           | Trinidad and Tobago(113.47) |

|      |                |                 |                           |                          |              |                         |     |                |                  |
|------|----------------|-----------------|---------------------------|--------------------------|--------------|-------------------------|-----|----------------|------------------|
| Male | Nepal(3528.42) | Guinea(2787.55) | Papua New Guinea(3019.75) | Solomon Islands(2724.70) | Peru(209.68) | Antigua Barbuda(222.80) | and | Tobago(124.93) | Barbados(232.94) |
|------|----------------|-----------------|---------------------------|--------------------------|--------------|-------------------------|-----|----------------|------------------|

---

**Supplementary Figure S1** The incident cases (A), age-standardized incidence (B), death (C) and DALY (D) rates of chronic obstructive pulmonary disease between 1990 and 2019 among sexes.

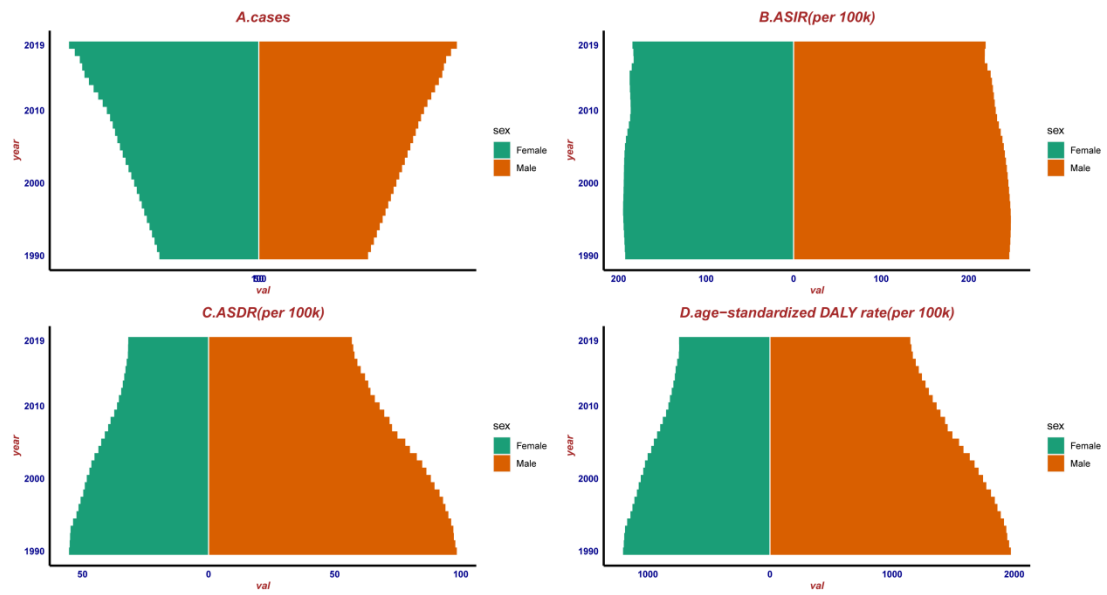

**Supplementary Figure S2** The EAPC of Chronic Obstructive Pulmonary Disease ASR from 1990 to 2019, by sex and region.

**Note:** A: The EAPC of ASIR; B: The EAPC of ASDR; C: The EAPC of age-standardized DALY rate.

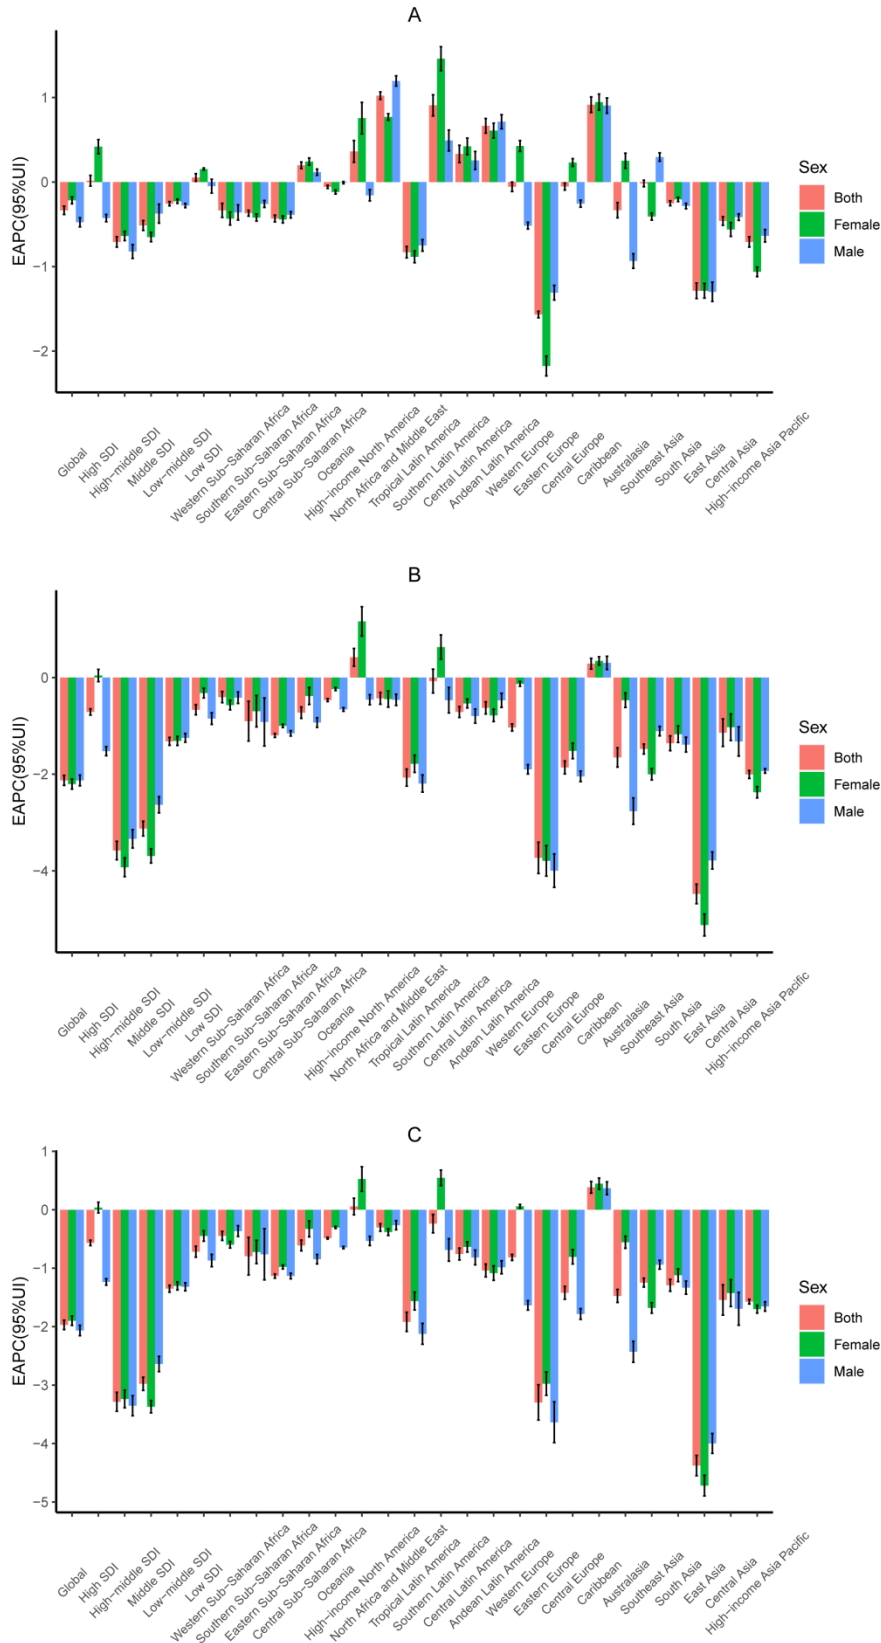

**Supplementary Figure S3** The correlation between EAPC and Chronic Obstructive Pulmonary Disease ASR (incidence (a), death (c), and DALY (e)) in 1990 and HDI (incidence (b), death (d), and DALY (f)) in 2019.

**Note:** The circles represent countries that were available on SDI data. The size of circle represents the number of Chronic Obstructive Pulmonary Disease patients. The  $\rho$  indices Pearson's correlation coefficient and p values were derived from Pearson's correlation analysis. ASR, age-standardized incidence/death/DALY rate; EAPC, estimated annual percentage change; SDI, socio-demographic index

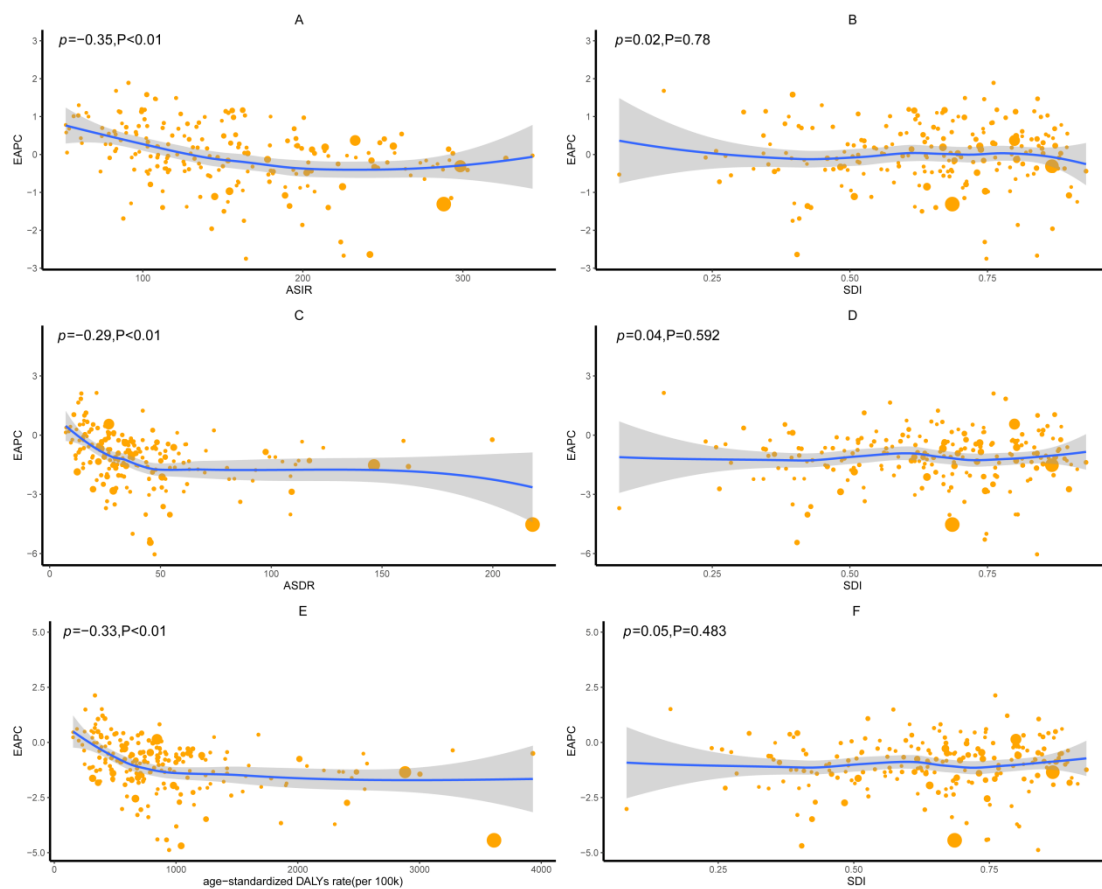

**Supplementary Figure S4** The proportion of different ages in chronic obstructive pulmonary disease incidence (A) and death (B) by years.

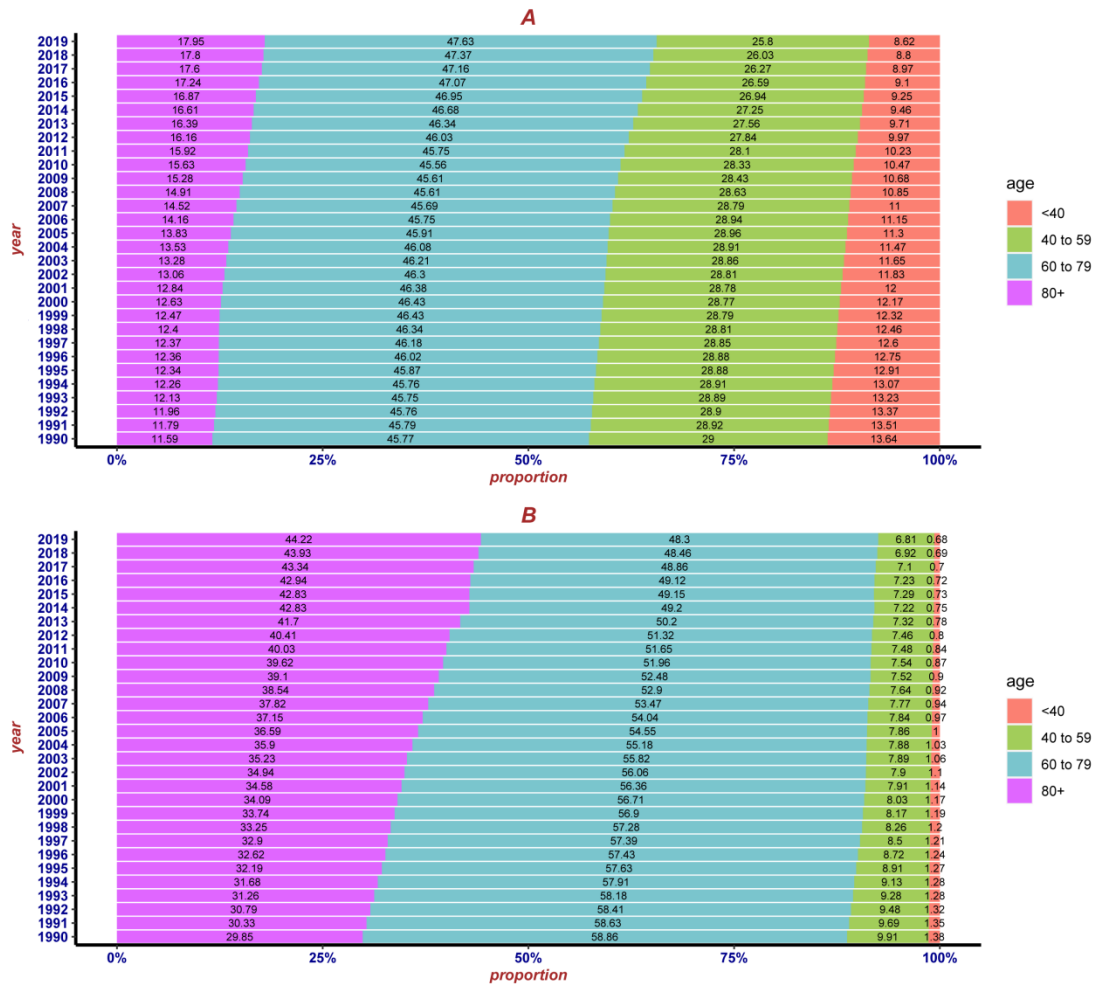



**Supplementary Figure S5** The global EAPC of chronic obstructive pulmonary disease for both sexes in 204 countries.

**Note:** A: The EAPC of ASIR; B: The EAPC of ASDR; C: The EAPC of age-standardized DALY rate.

**Supplementary Figure S5A: The EAPC of ASIR**

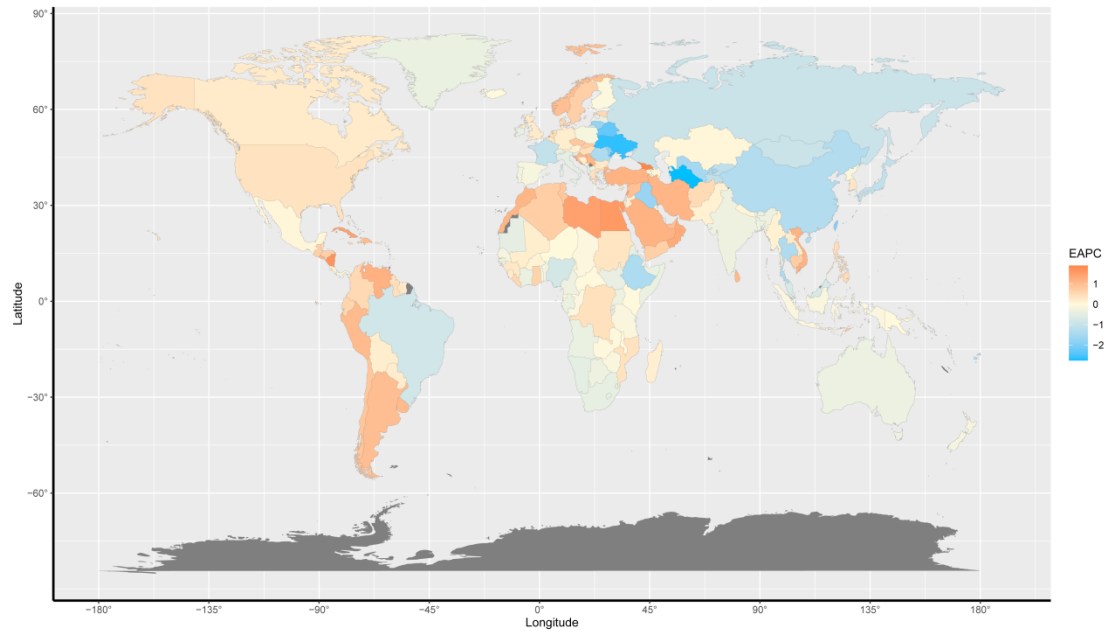

**Supplementary Figure S5B: The EAPC of ASDR**

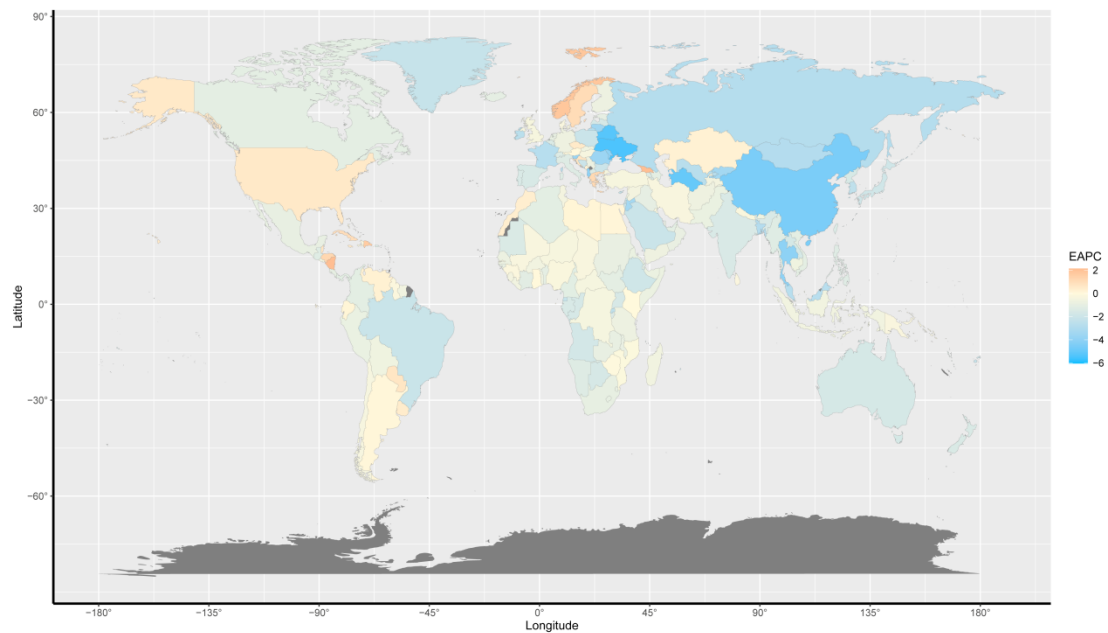

**Supplementary Figure S5C: The EAPC of age-standardized DALY rate**

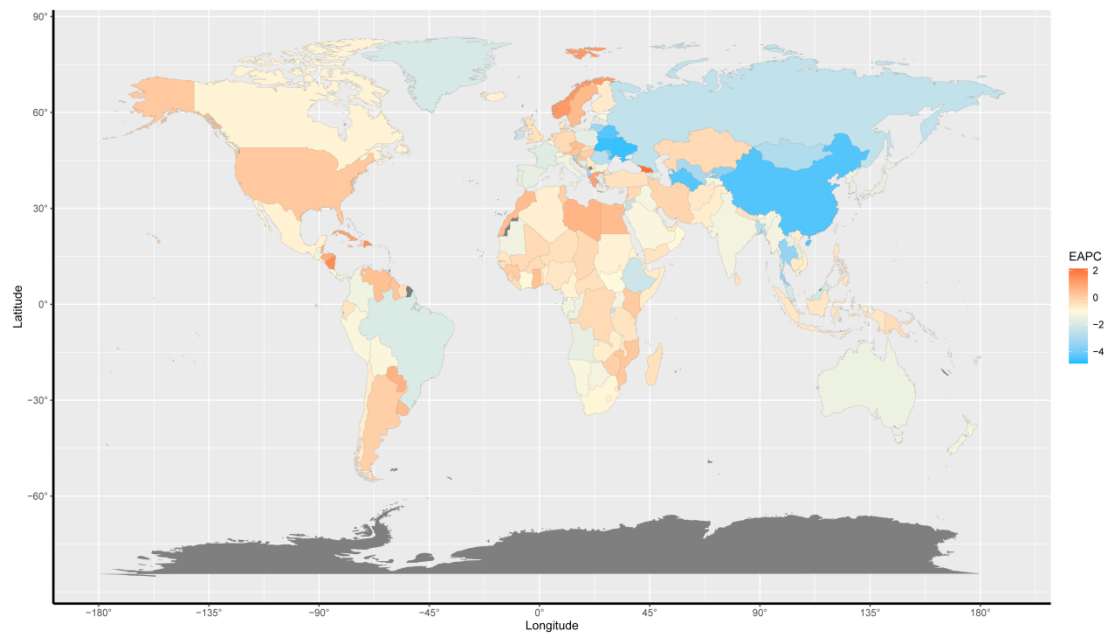

**Supplementary Figure S6** The global EAPC of chronic obstructive pulmonary disease for Female in 204 countries.

**Note:** A: The EAPC of ASIR; B: The EAPC of ASDR; C: The EAPC of age-standardized DALY rate.

**Supplementary Figure S6A:** The EAPC of ASIR

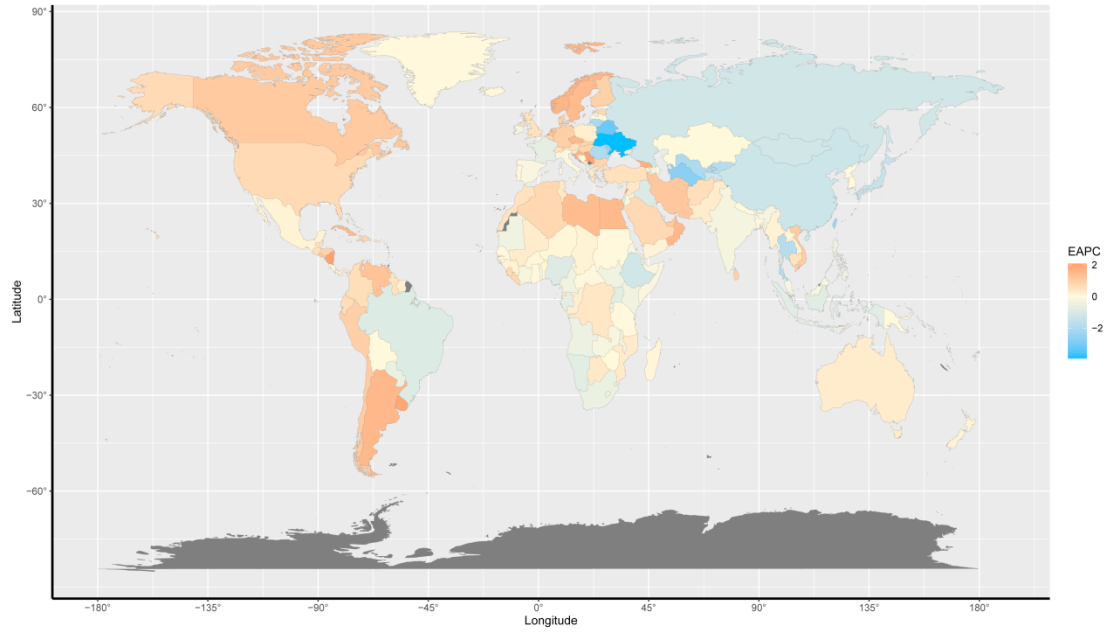

**Supplementary Figure S6B:** The EAPC of ASDR

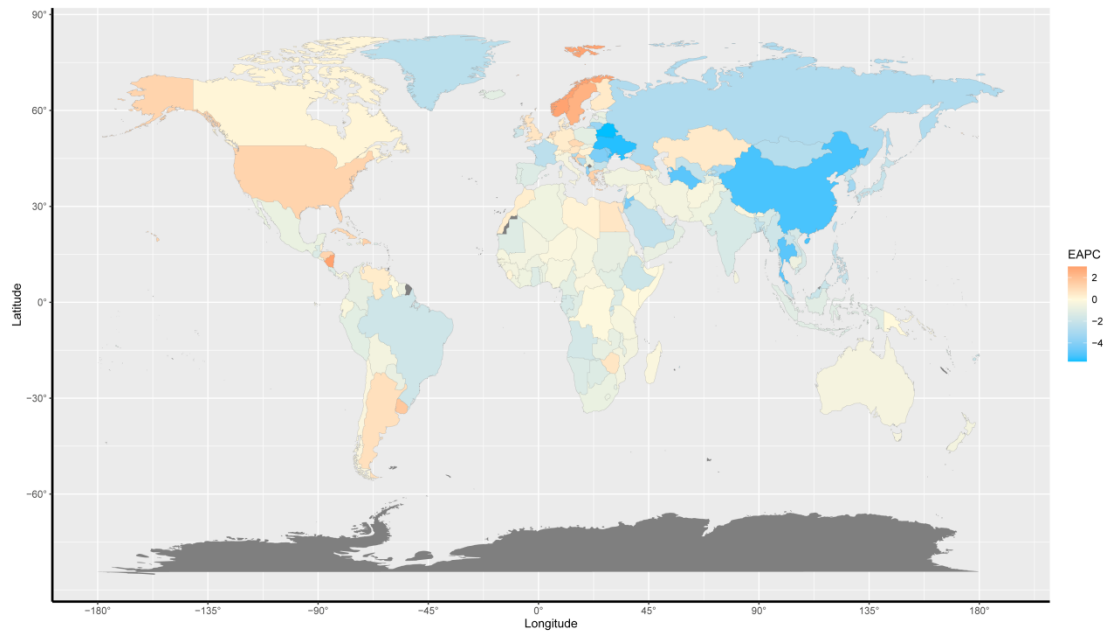

**Supplementary Figure S6C: The EAPC of age-standardized DALY rate**

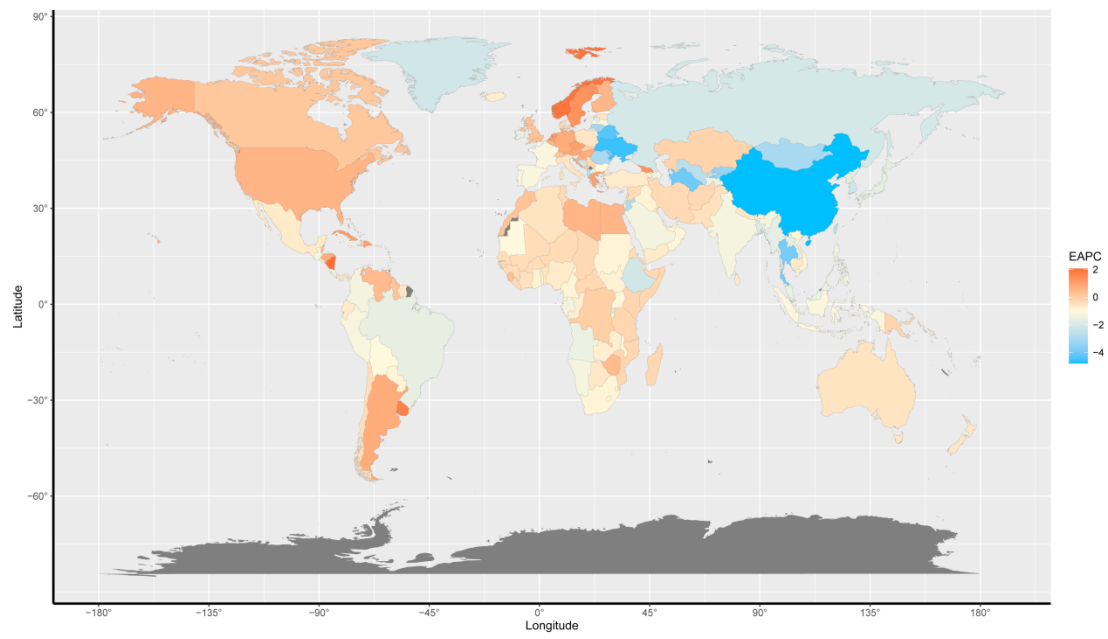

**Supplementary Figure S7** The global EAPC of chronic obstructive pulmonary disease for male in 204 countries.

**Note:** A: The EAPC of ASIR; B: The EAPC of ASDR; C: The EAPC of age-standardized DALY rate.

**Supplementary Figure S7A:** The EAPC of ASIR

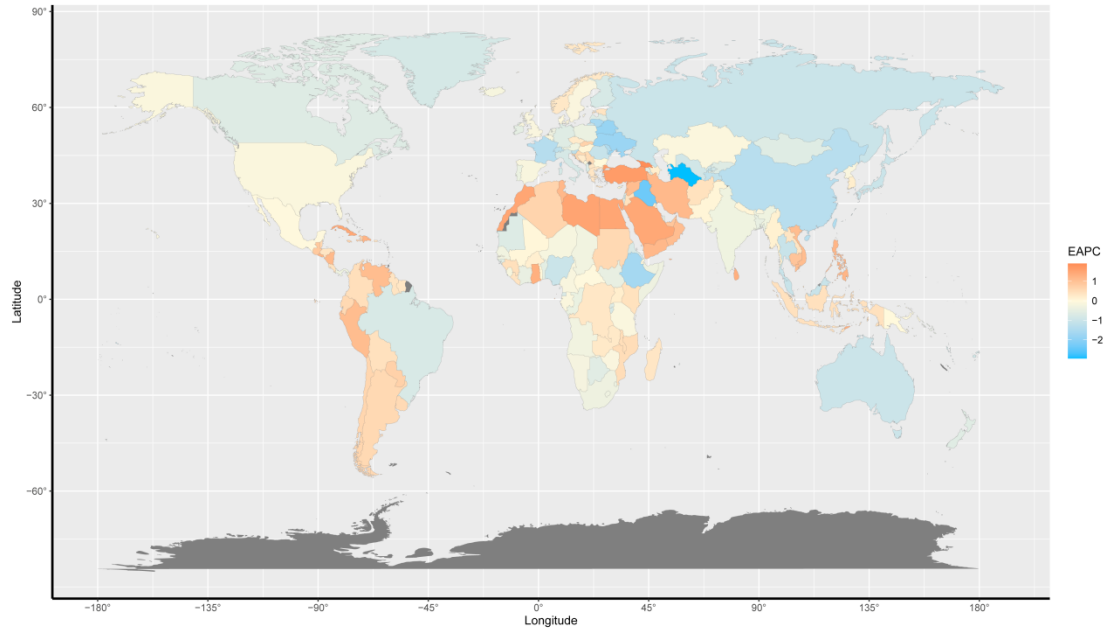

**Supplementary Figure S7B:** The EAPC of ASDR

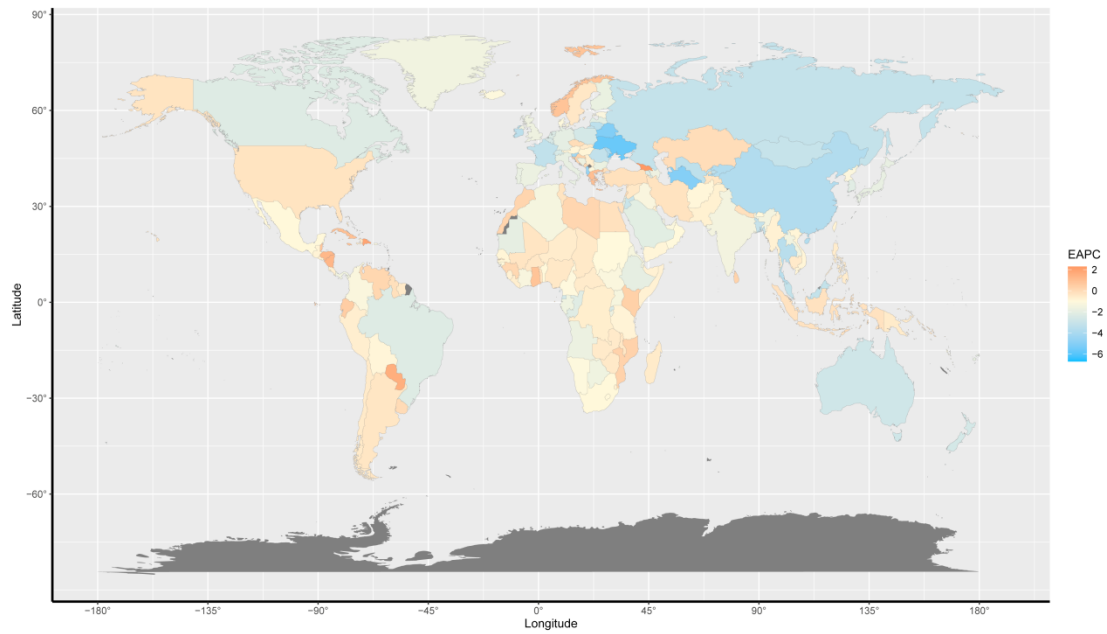

**Supplementary Figure S7C: The EAPC of age-standardized DALY rate**

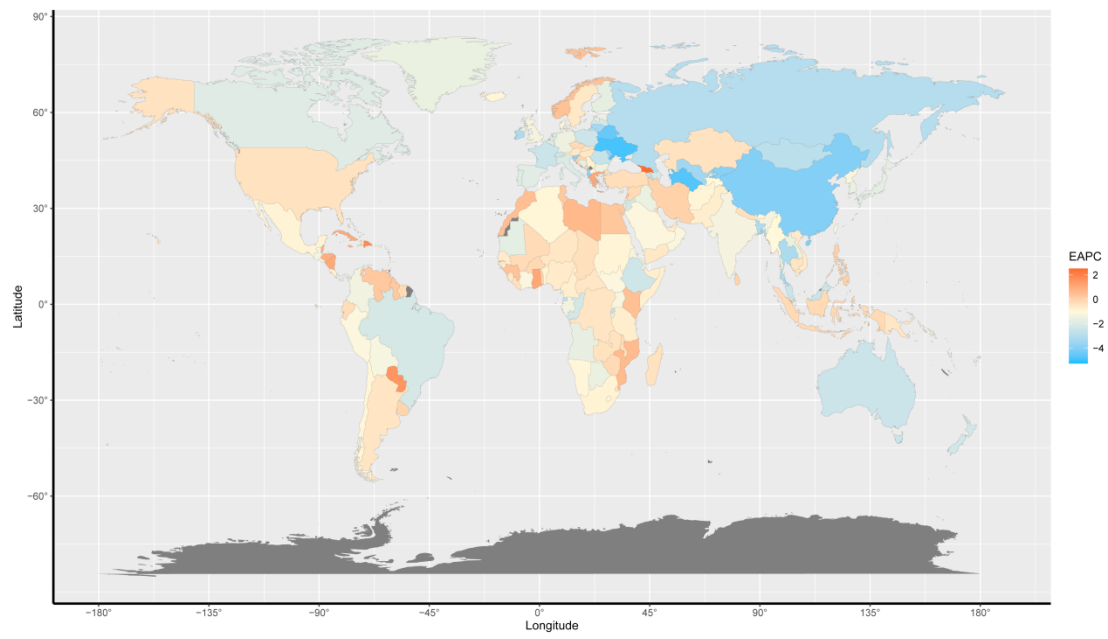

**Supplementary Figure S8** The global disease burden of chronic obstructive pulmonary disease for Female in 204 countries.

**Note:** A: The ASIR of chronic obstructive pulmonary disease in 2019; B: The ASDR of chronic obstructive pulmonary disease in 2019; C: The age-standardized DALY rate of chronic obstructive pulmonary disease in 2019. ASIR: age-standardized incidence rate; ASDR: age-standardized death rate.

**Supplementary Figure S8A:** The ASIR of chronic obstructive pulmonary disease in 2019

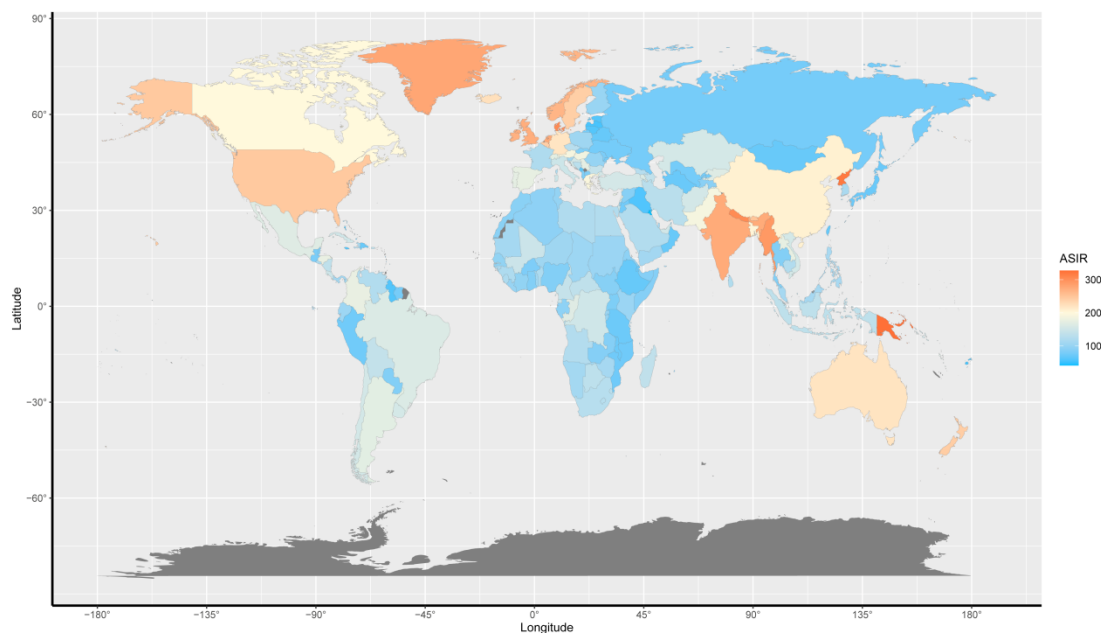

**Supplementary Figure S8B:** The ASDR of chronic obstructive pulmonary disease in 2019

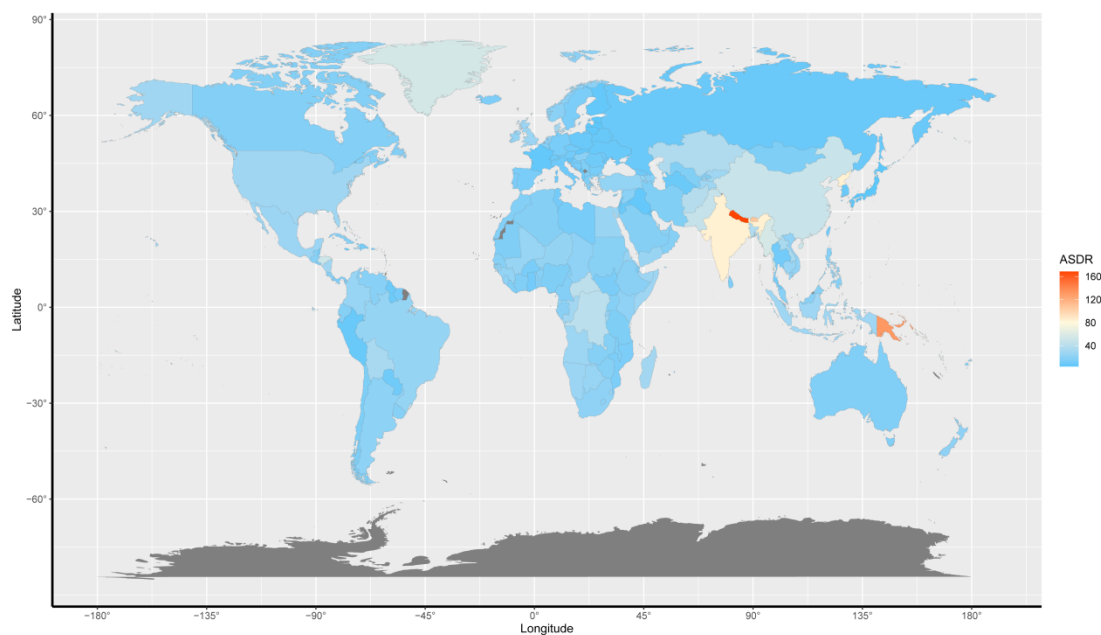

**Supplementary Figure S8C:** The age-standardized DALY rate of chronic obstructive pulmonary disease in 2019

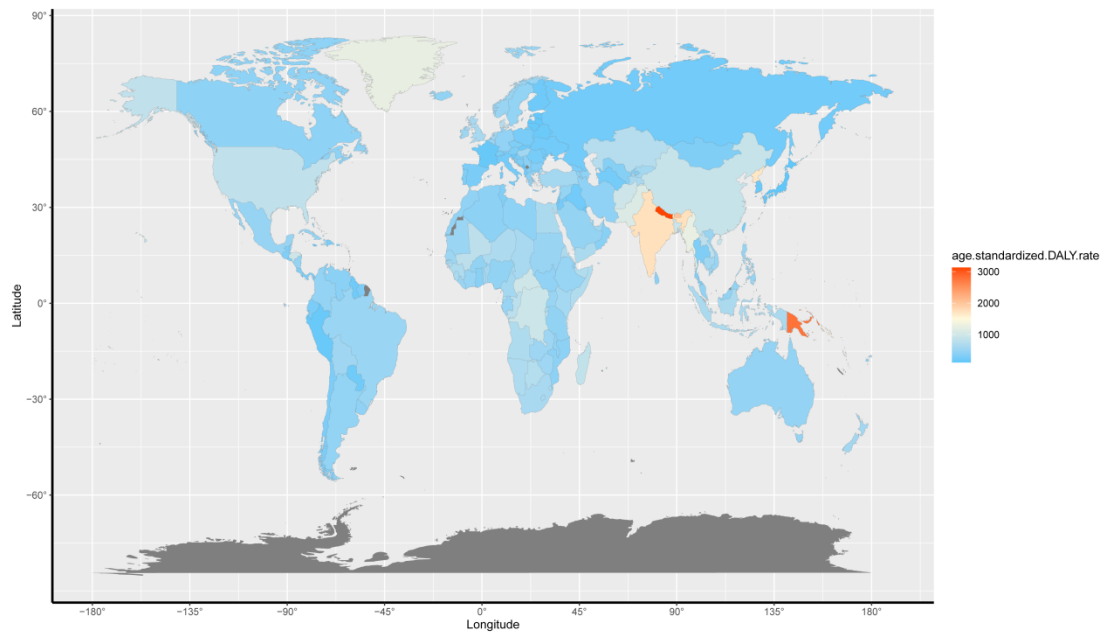



**Supplementary Figure S9** The global disease burden of chronic obstructive pulmonary disease for male in 204 countries.

**Note:** A: The ASIR of Chronic Obstructive Pulmonary Disease in 2019; B: The ASDR of chronic obstructive pulmonary disease in 2019; C: The age-standardized DALY rate of chronic obstructive pulmonary disease in 2019. ASIR: age-standardized incidence rate; ASDR: age-standardized death rate.

**Supplementary Figure S9A:** The ASIR of chronic obstructive pulmonary disease in 2019

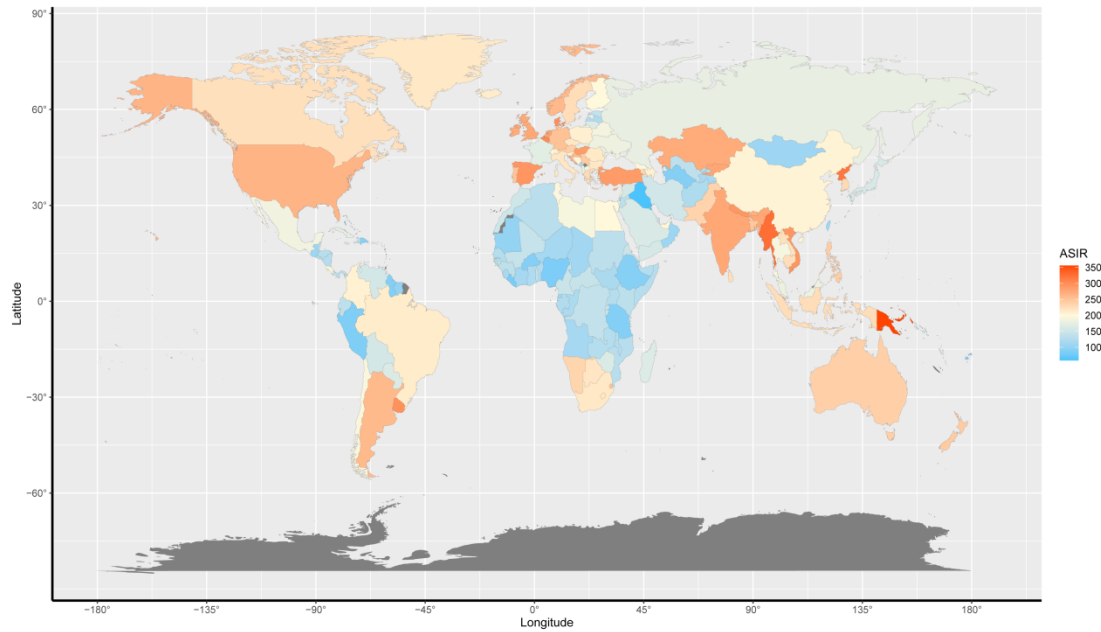

**Supplementary Figure S9B:** The ASDR of chronic obstructive pulmonary disease in 2019

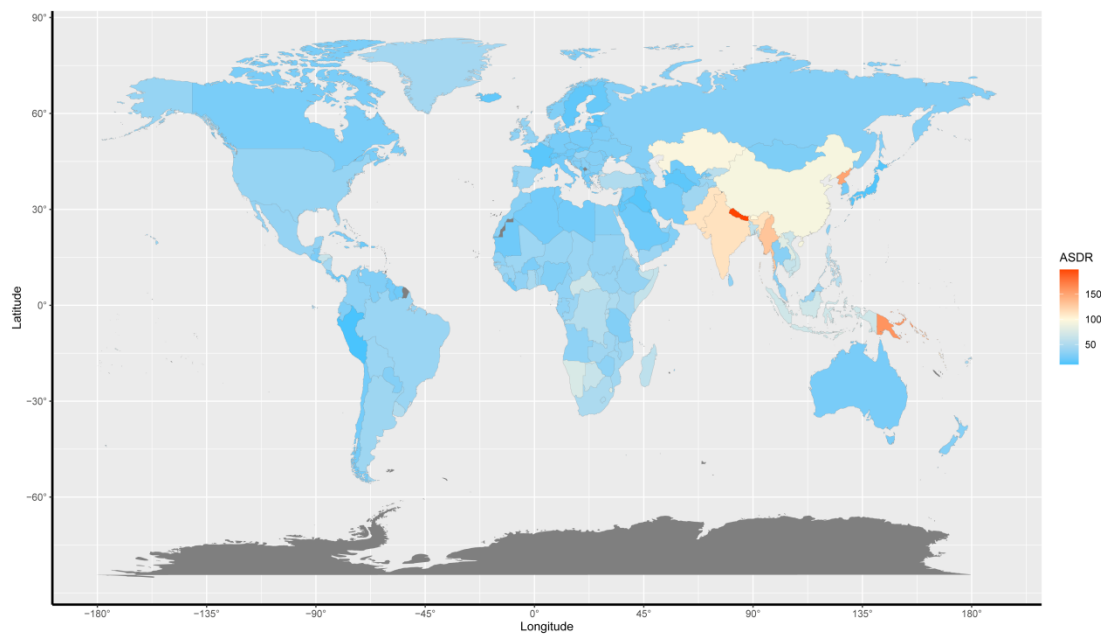

**Supplementary Figure S9C:** The age-standardized DALY rate of chronic obstructive pulmonary disease in 2019

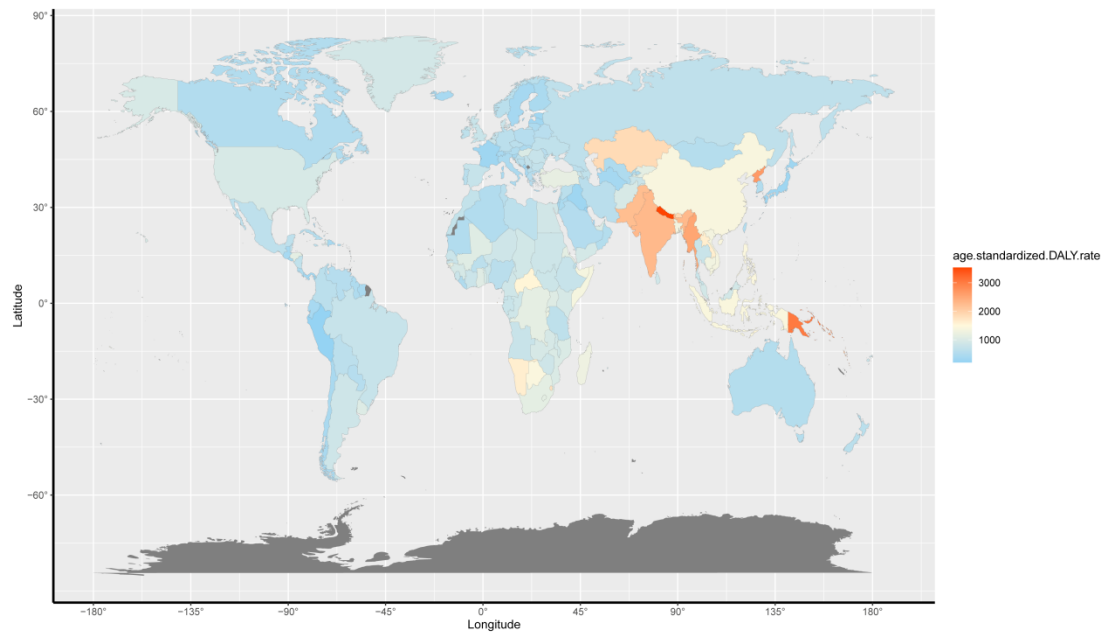

**Supplementary Figure S10** Causes of deaths risk for Female in global (A), high SDI (B), high-middle SDI (C), middle SDI (D), middle-low SDI (E) and low SDI (F).

**Note:** SDI, socio-demographic index.

**Supplementary Figure S10A:** global

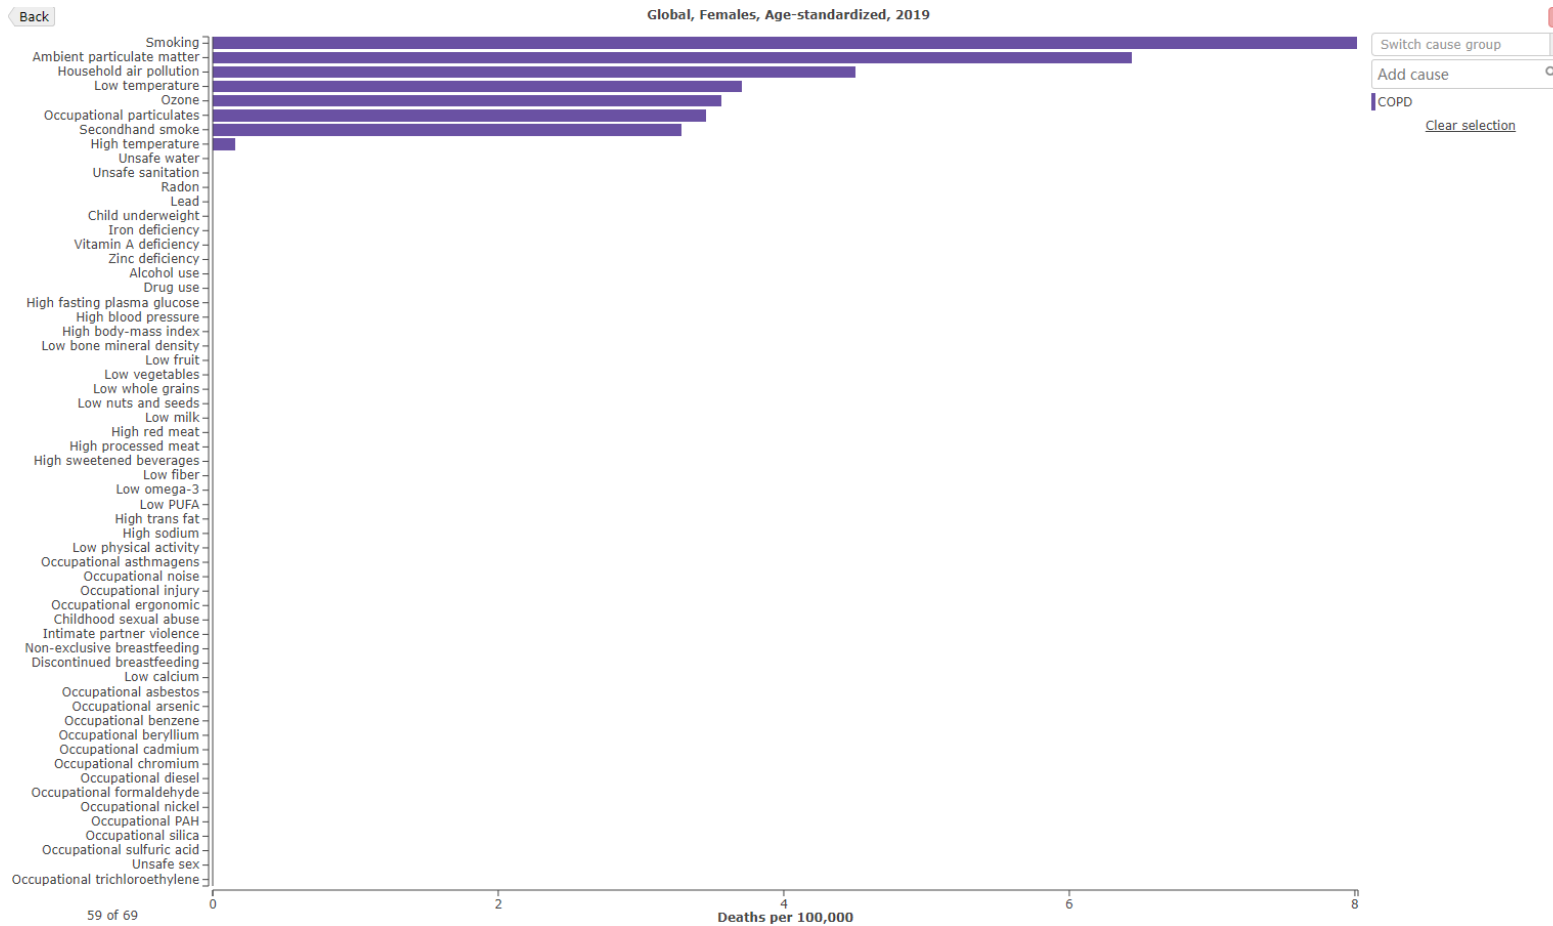

# Supplementary Figure S10B: high SDI

Back

High SDI, Females, Age-standardized, 2019

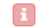

Switch cause group   
Add cause   
COPD   
[Clear selection](#)

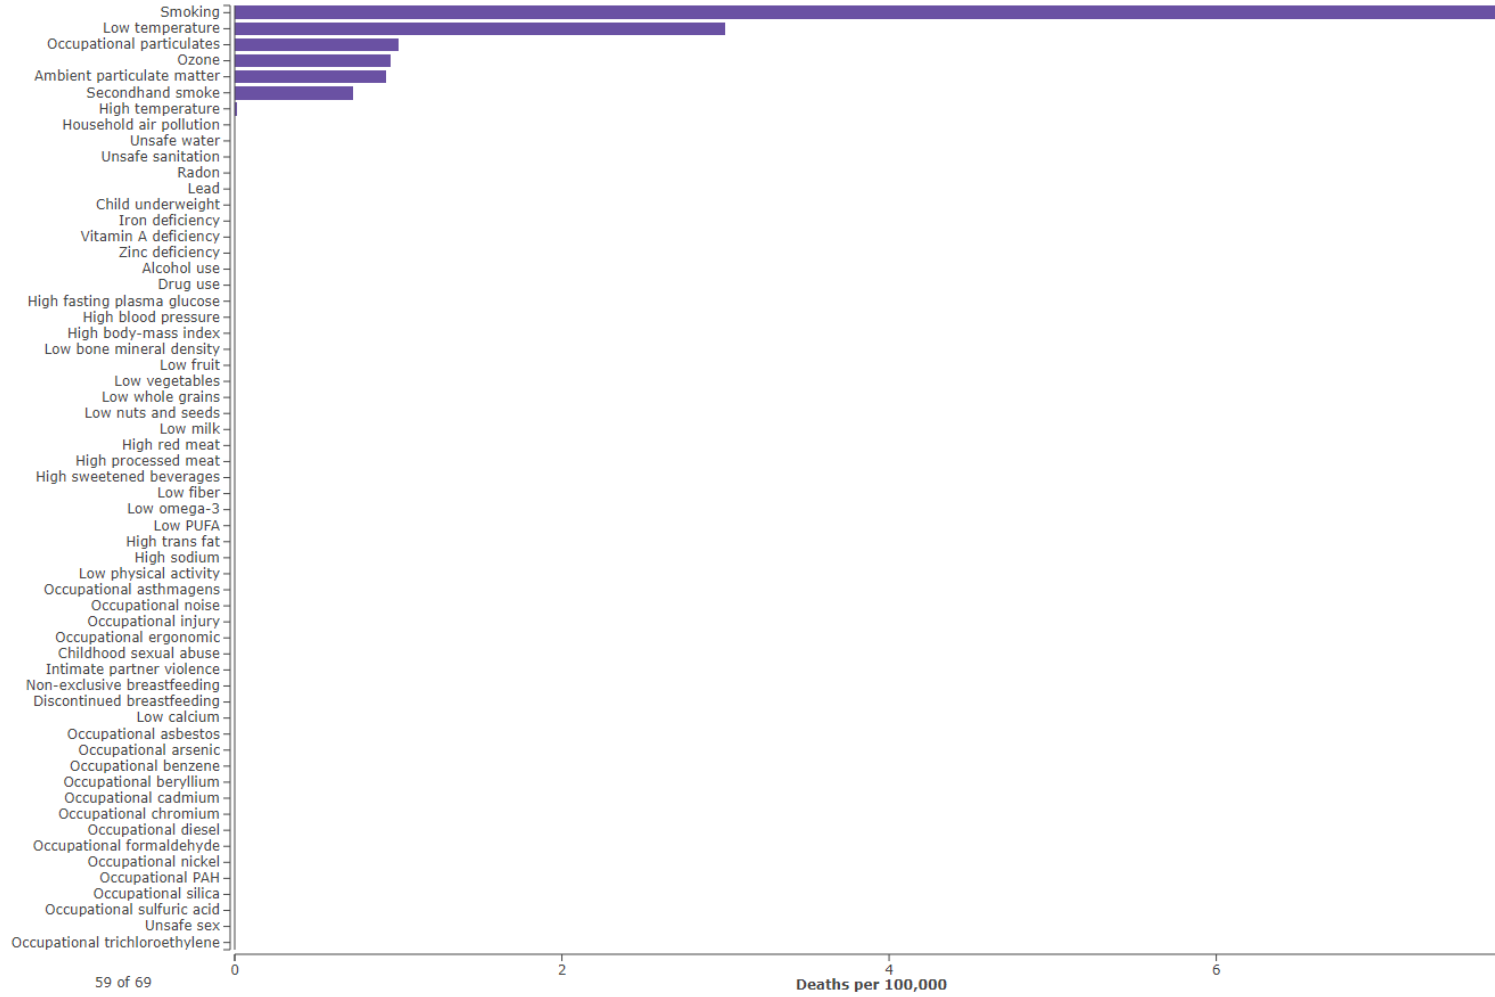

### Supplementary Figure S10C: high-middle SDI

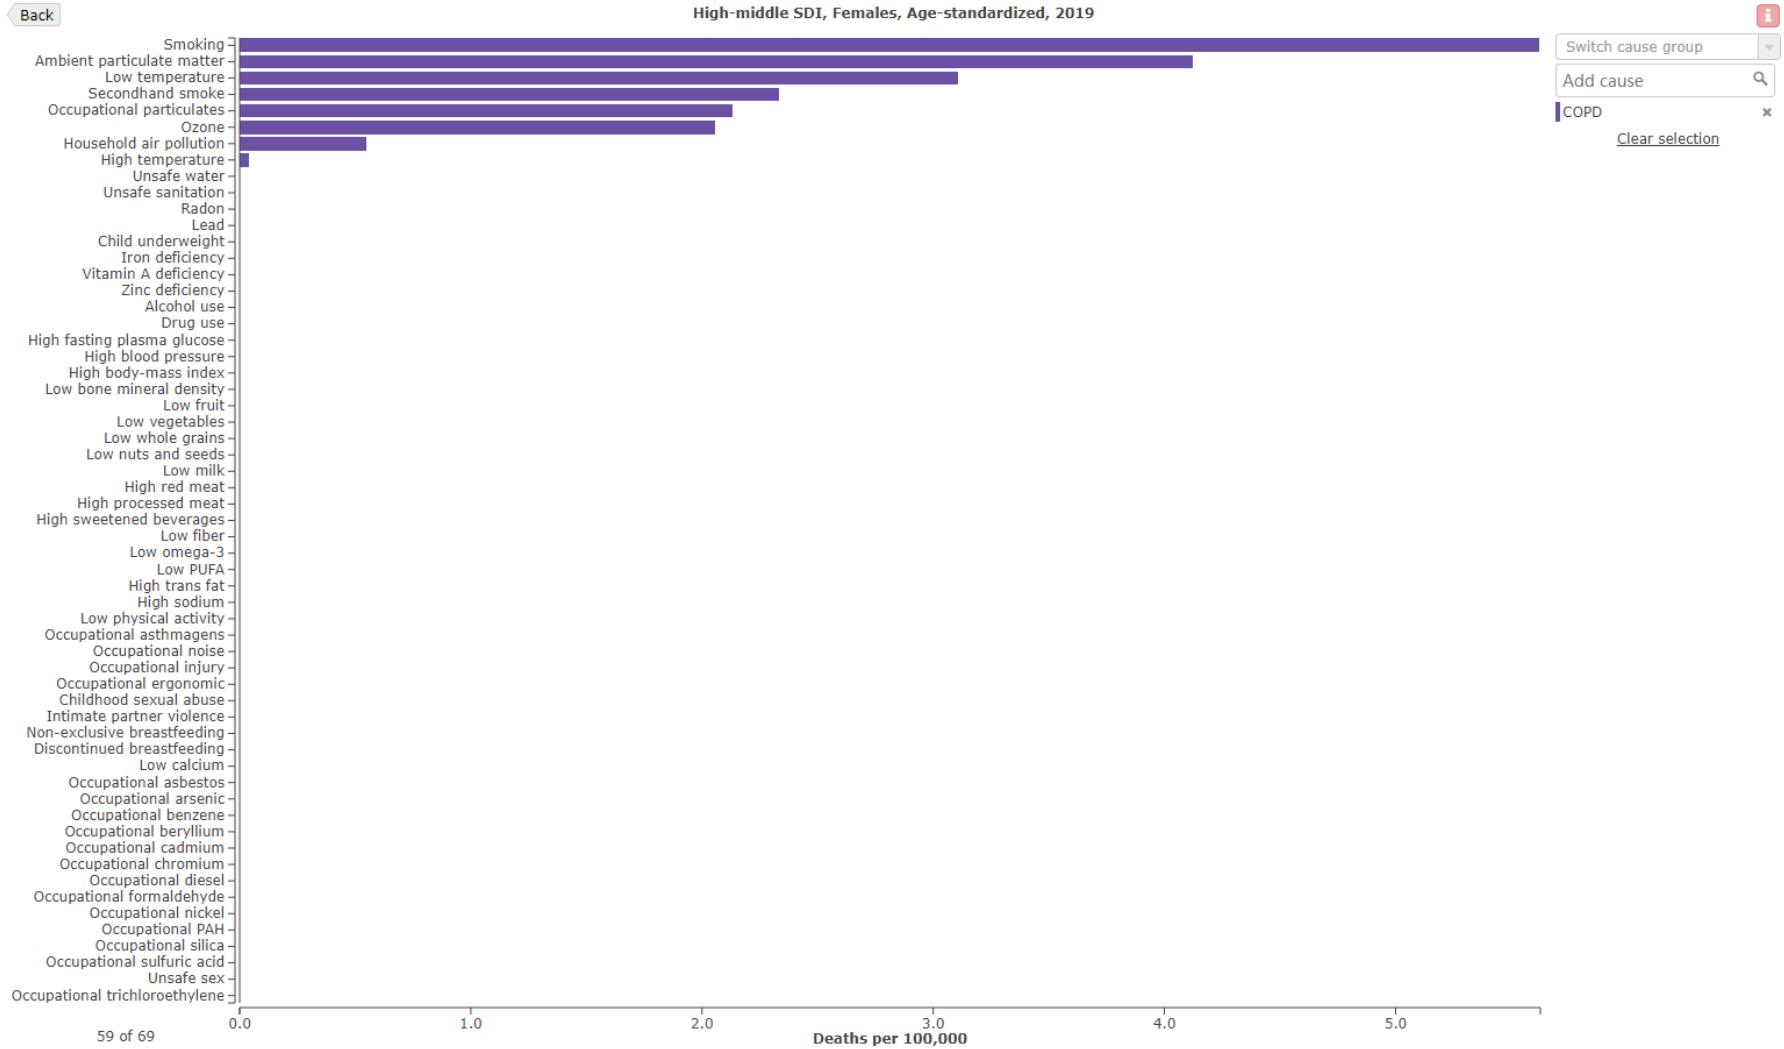

### Supplementary Figure S10D: middle SDI

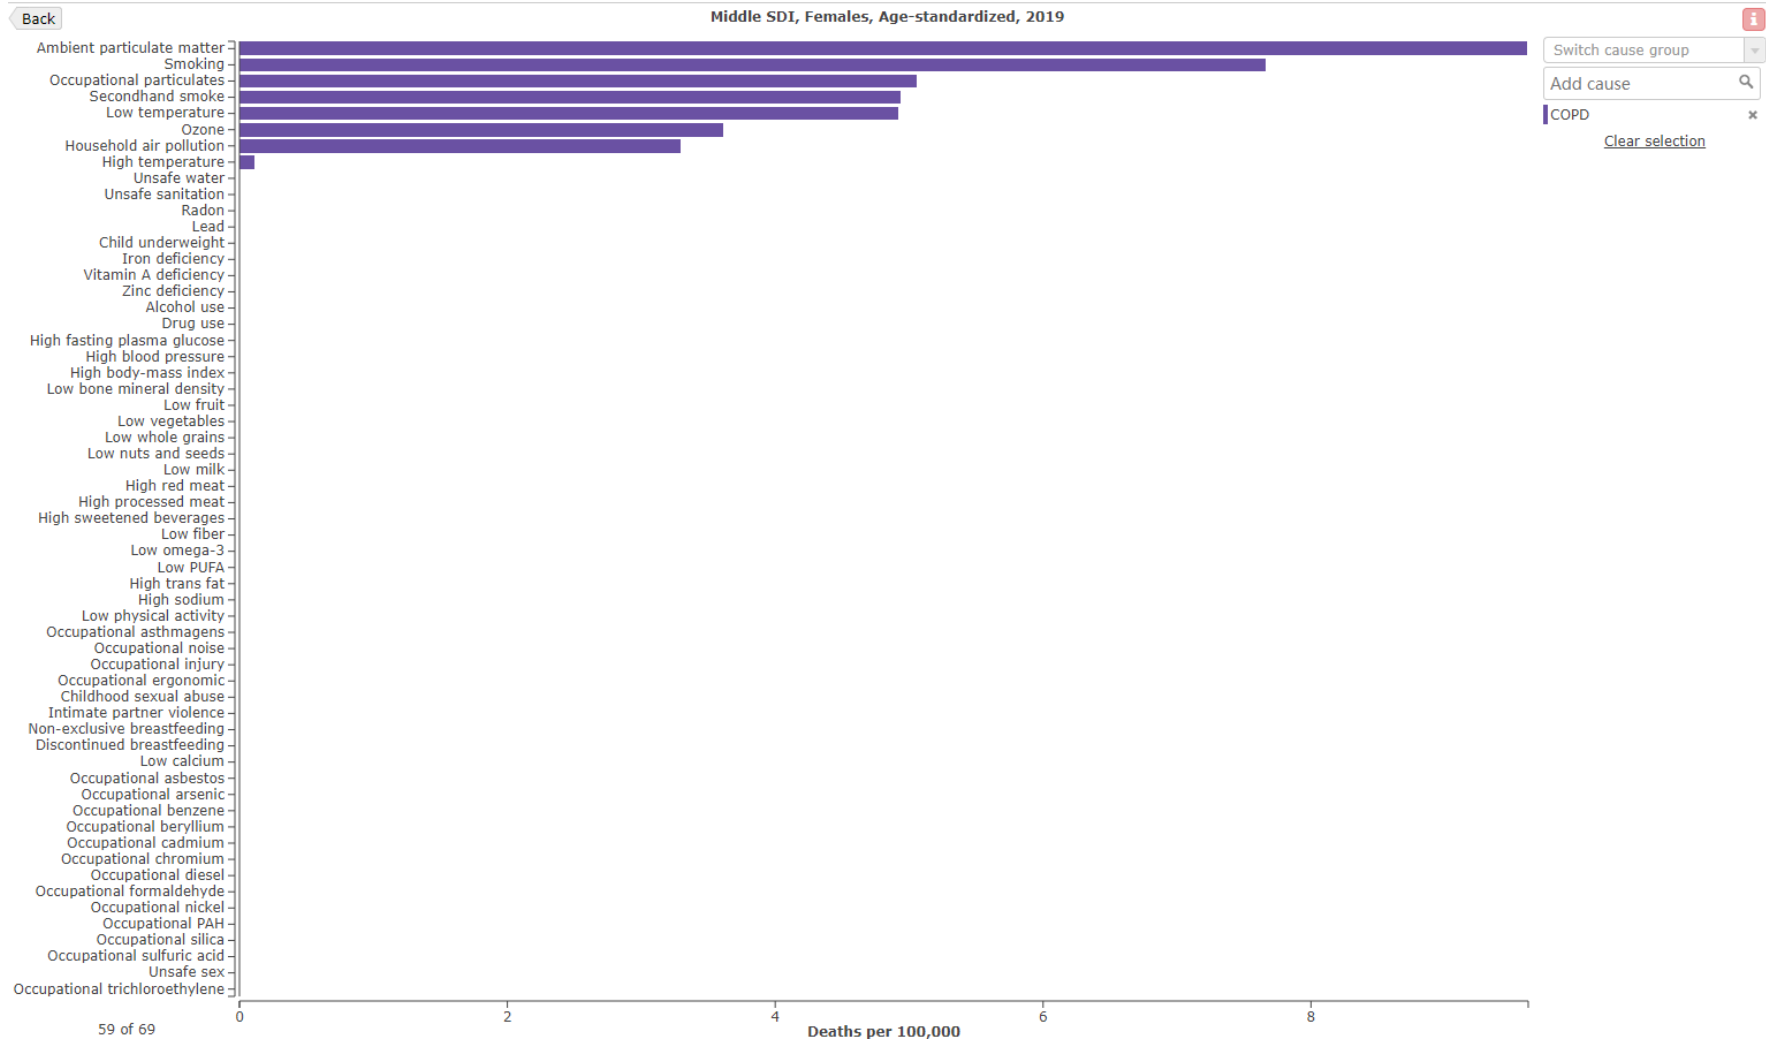

### Supplementary Figure S10E: middle-low SDI

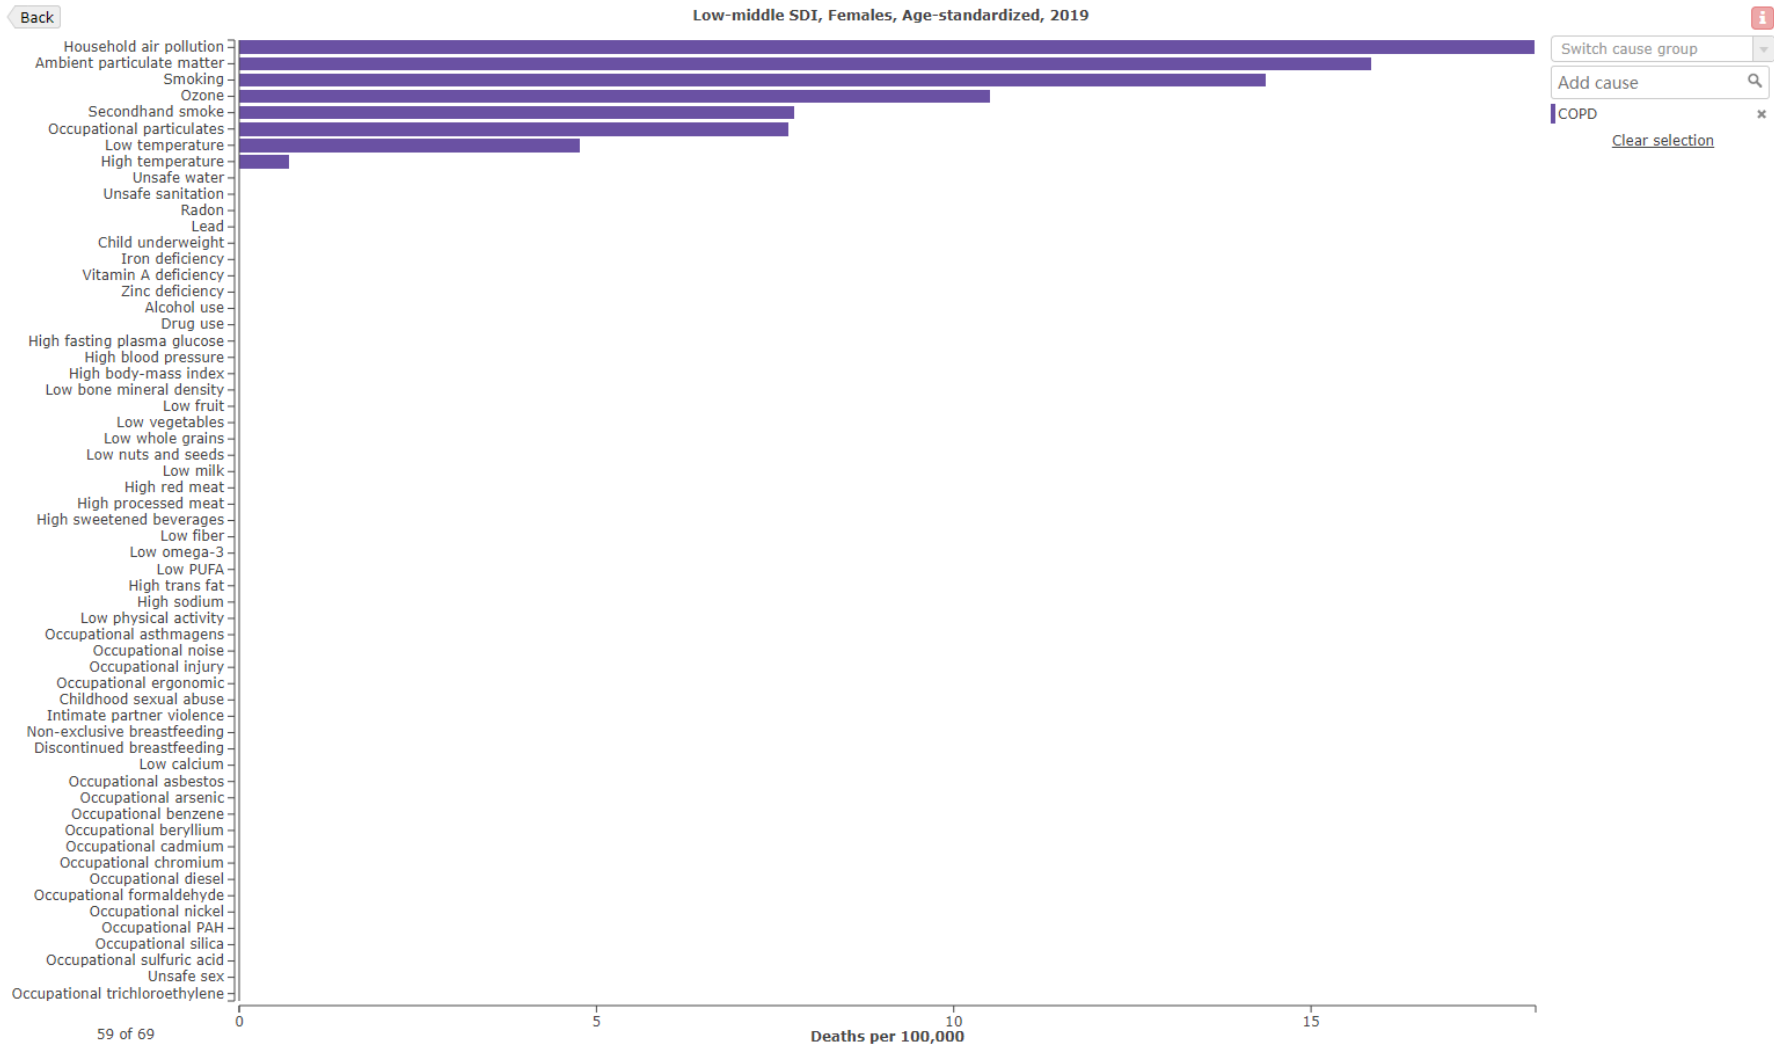

### Supplementary Figure S10F: low SDI

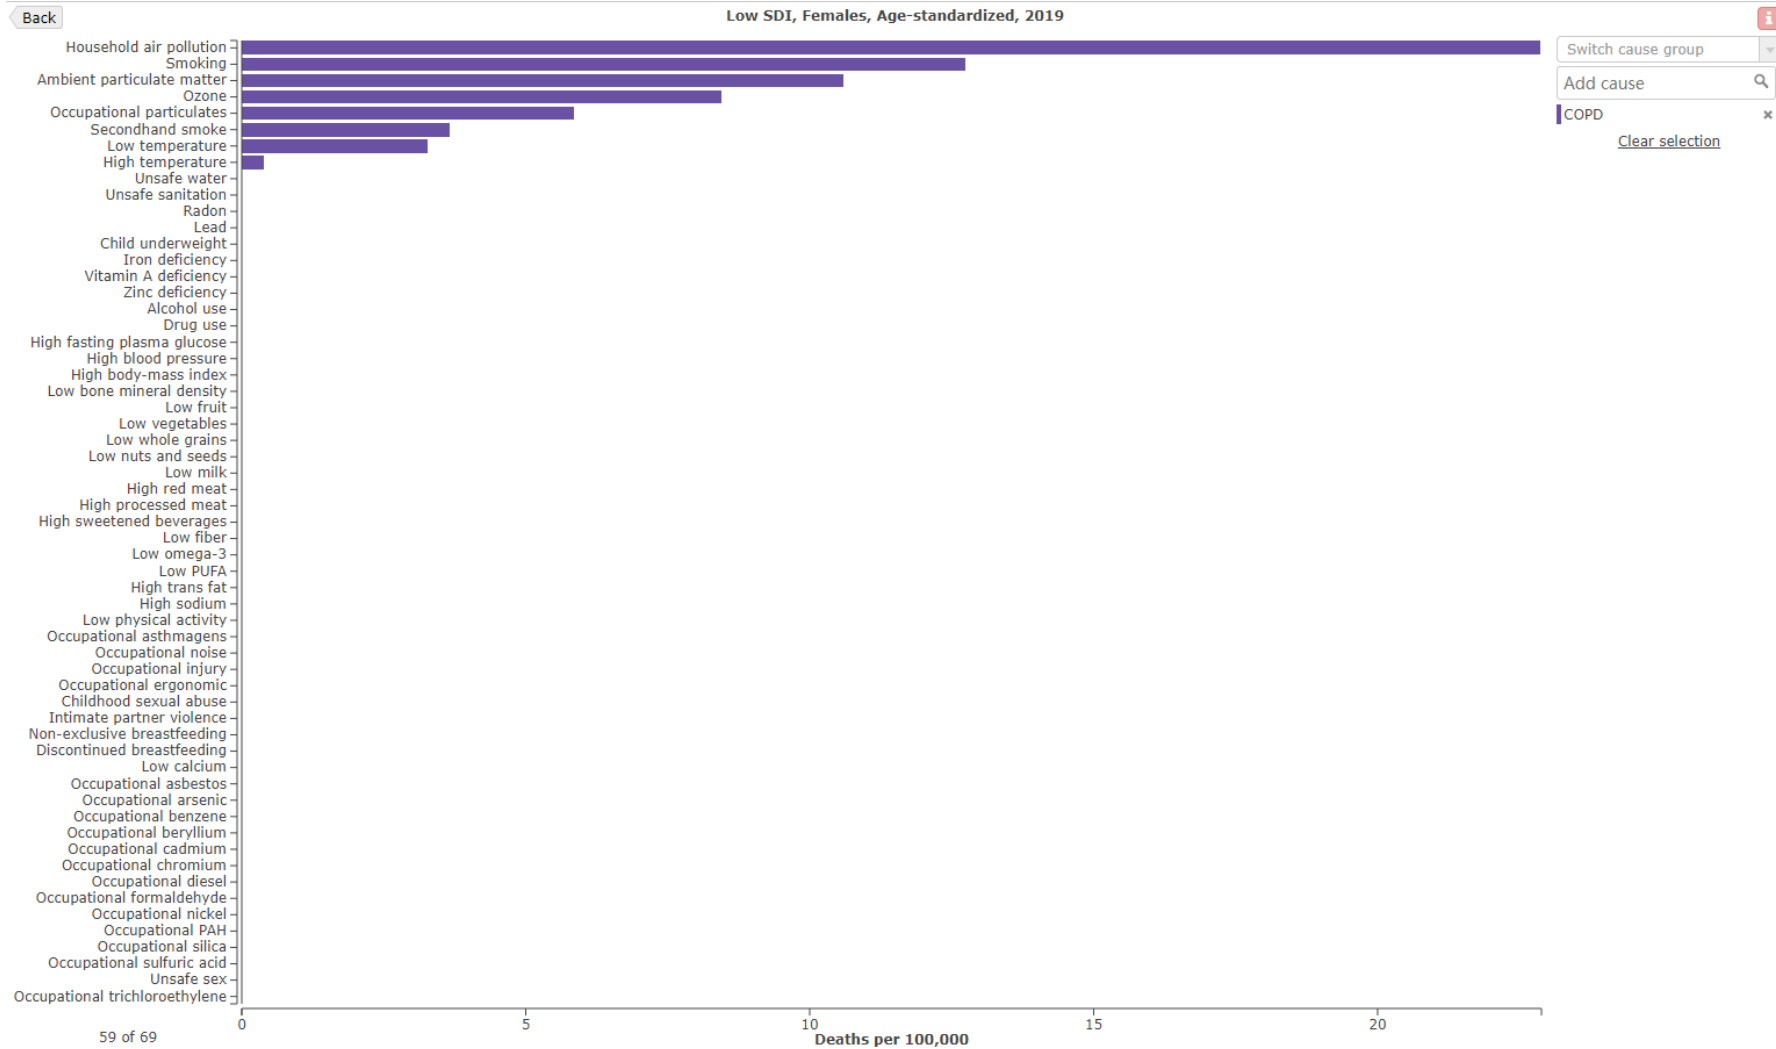



**Supplementary Figure S11** Causes of deaths risk for male in global (A), high SDI (B), high-middle SDI (C), middle SDI (D), middle-low SDI (E) and low SDI (F).

**Note:** SDI, socio-demographic index.

**Supplementary Figure S11A:** global

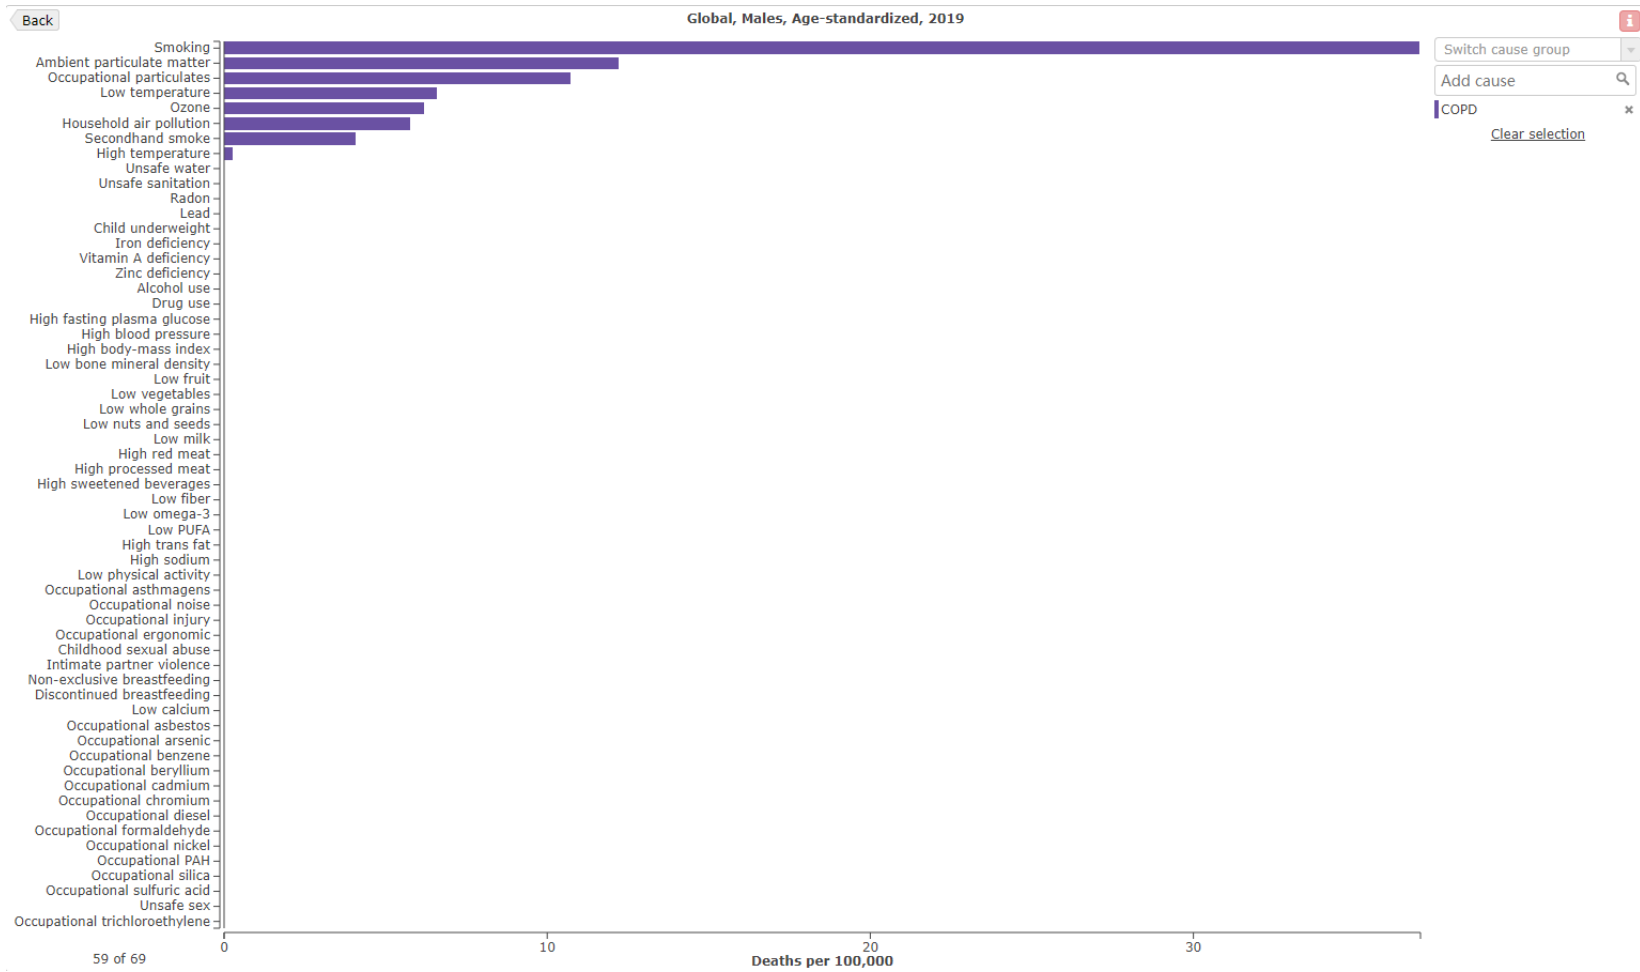

## Supplementary Figure S11B: high SDI

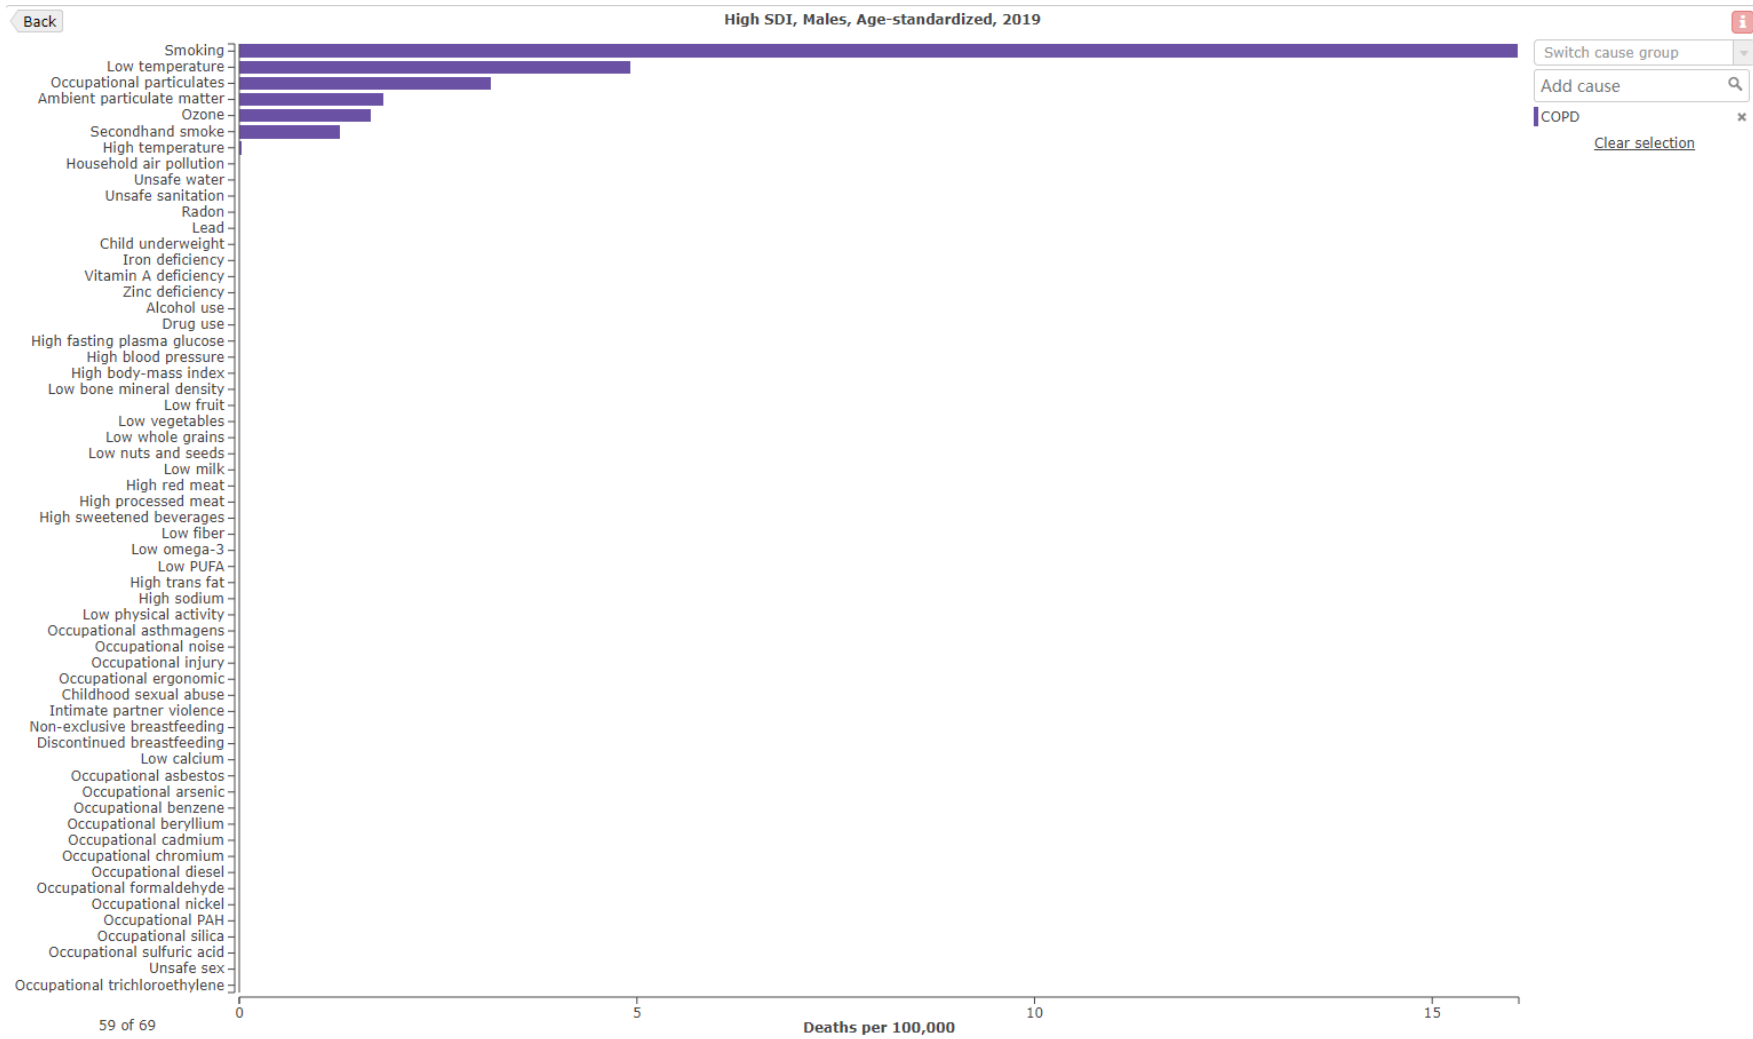

### Supplementary Figure S11C: high-middle SDI

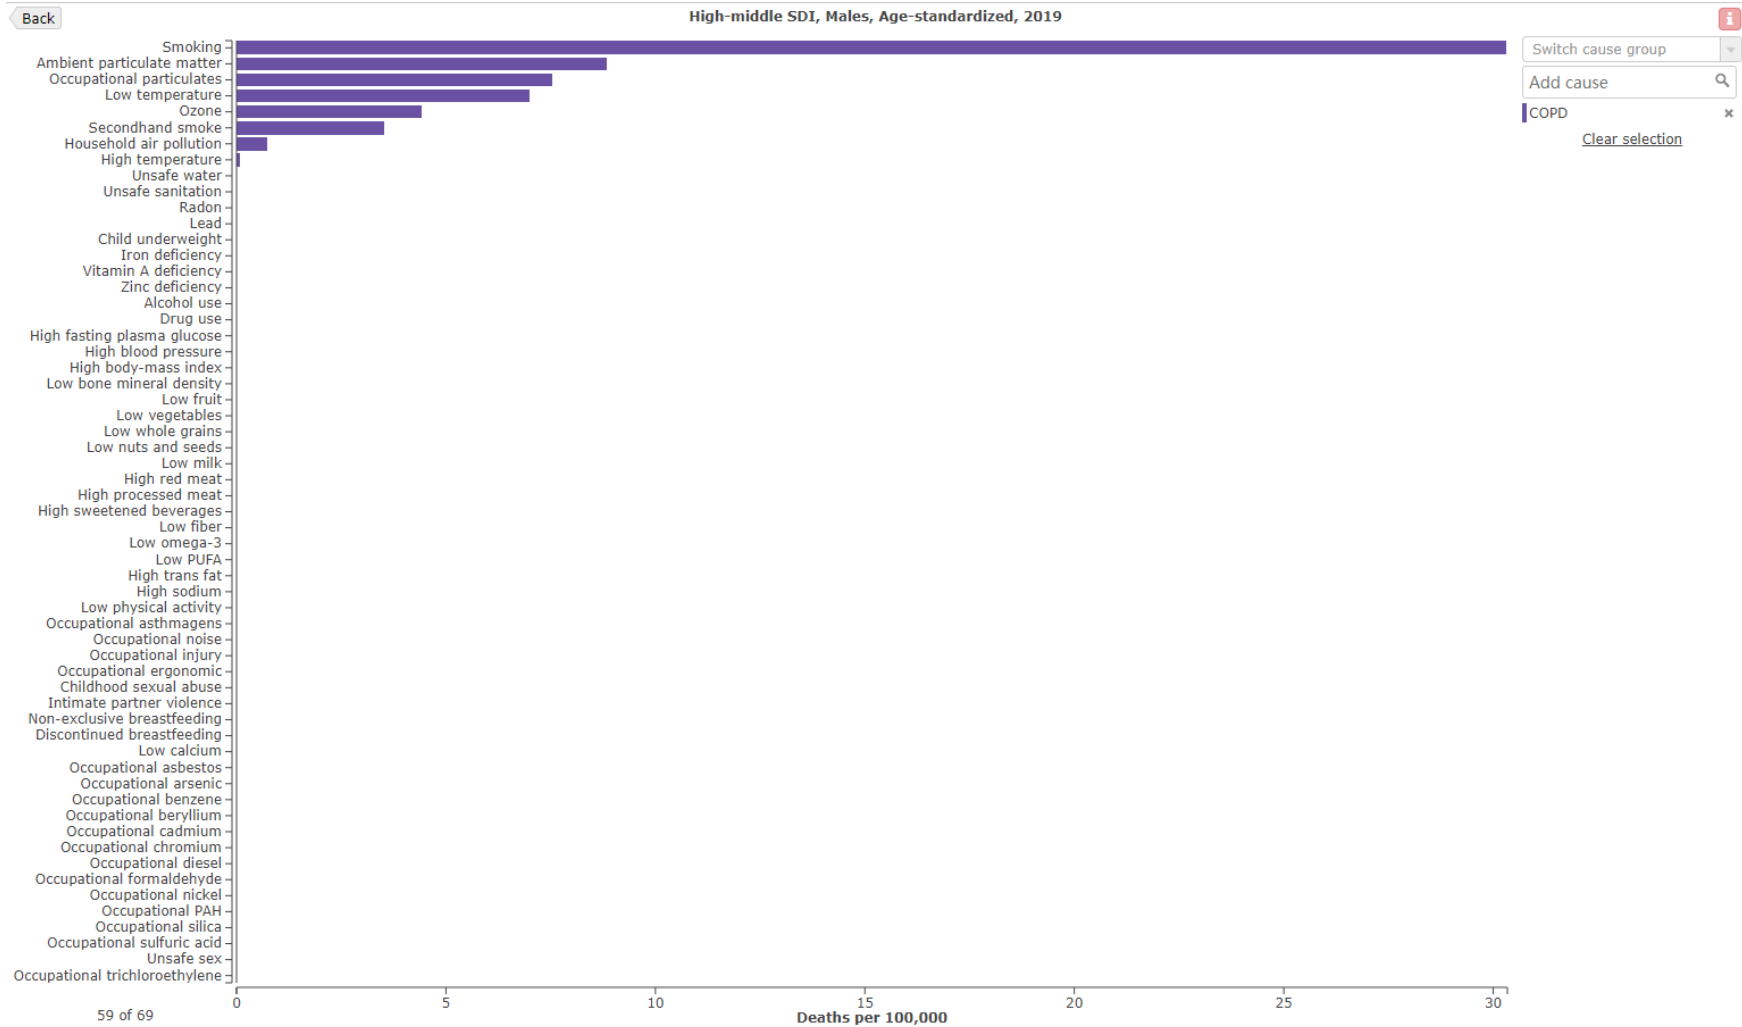

# Supplementary Figure S11D: middle SDI

Back

Middle SDI, Males, Age-standardized, 2019

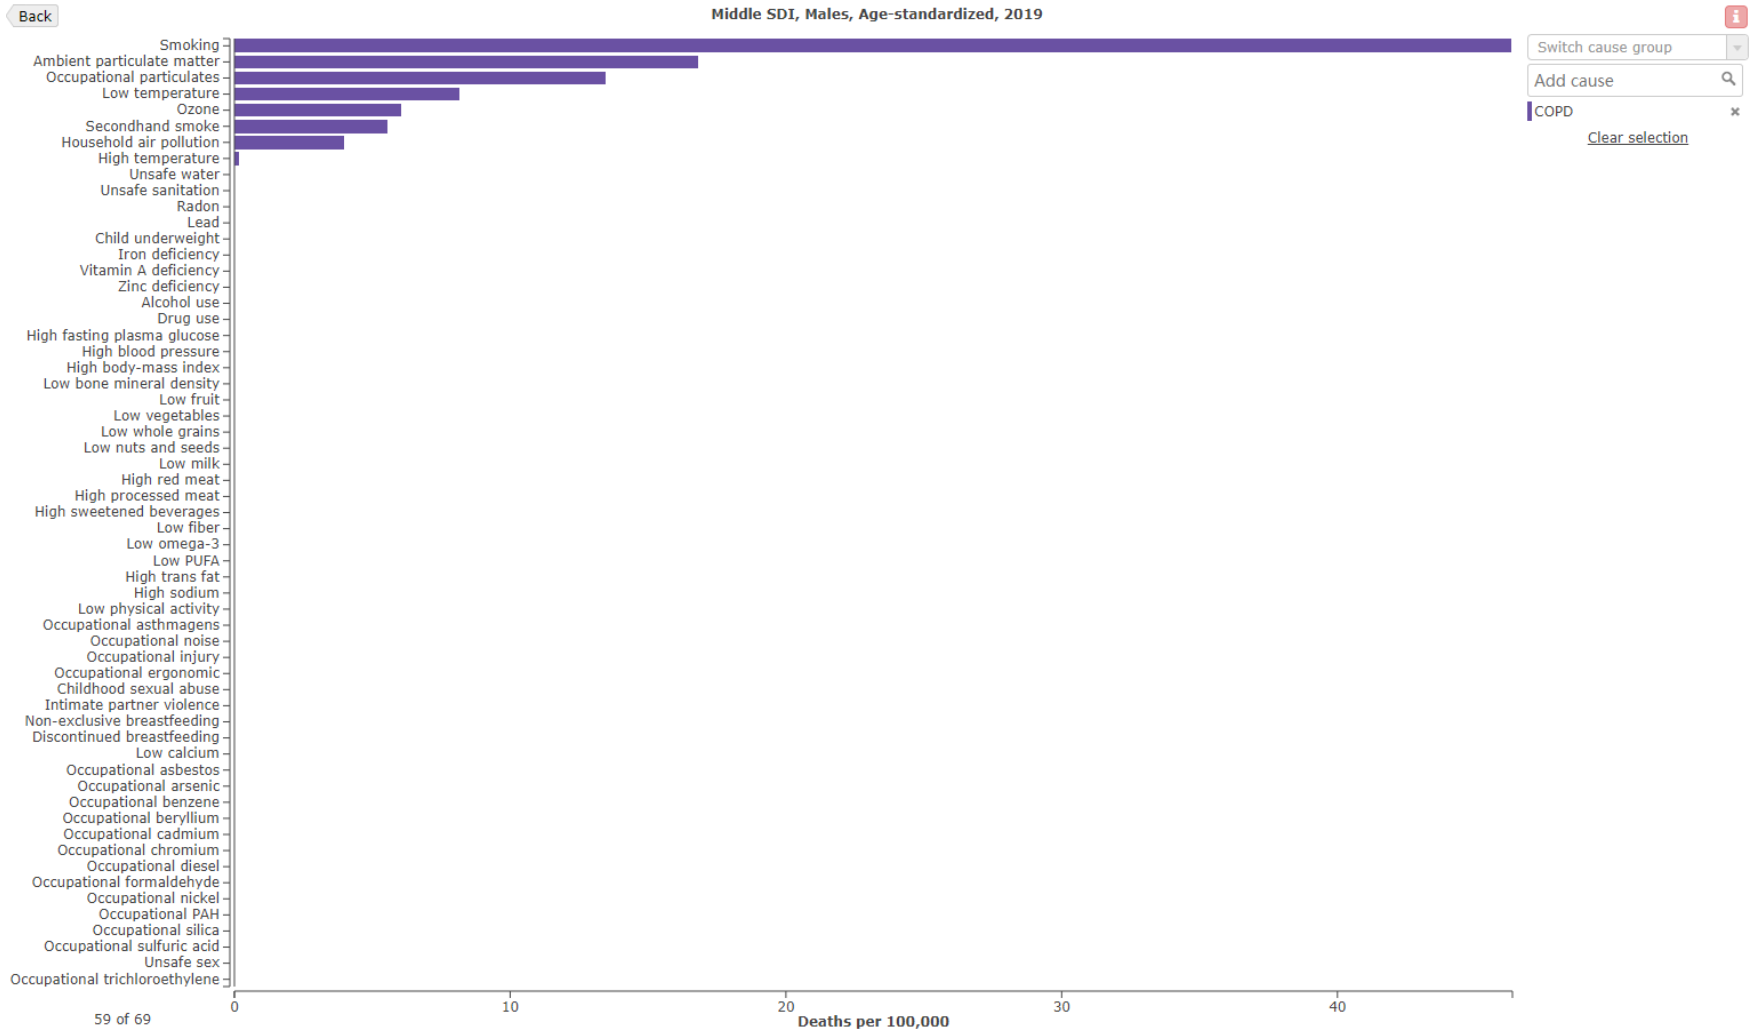

Switch cause group

Add cause

COPD

Clear selection

### Supplementary Figure S11E: middle-low SDI

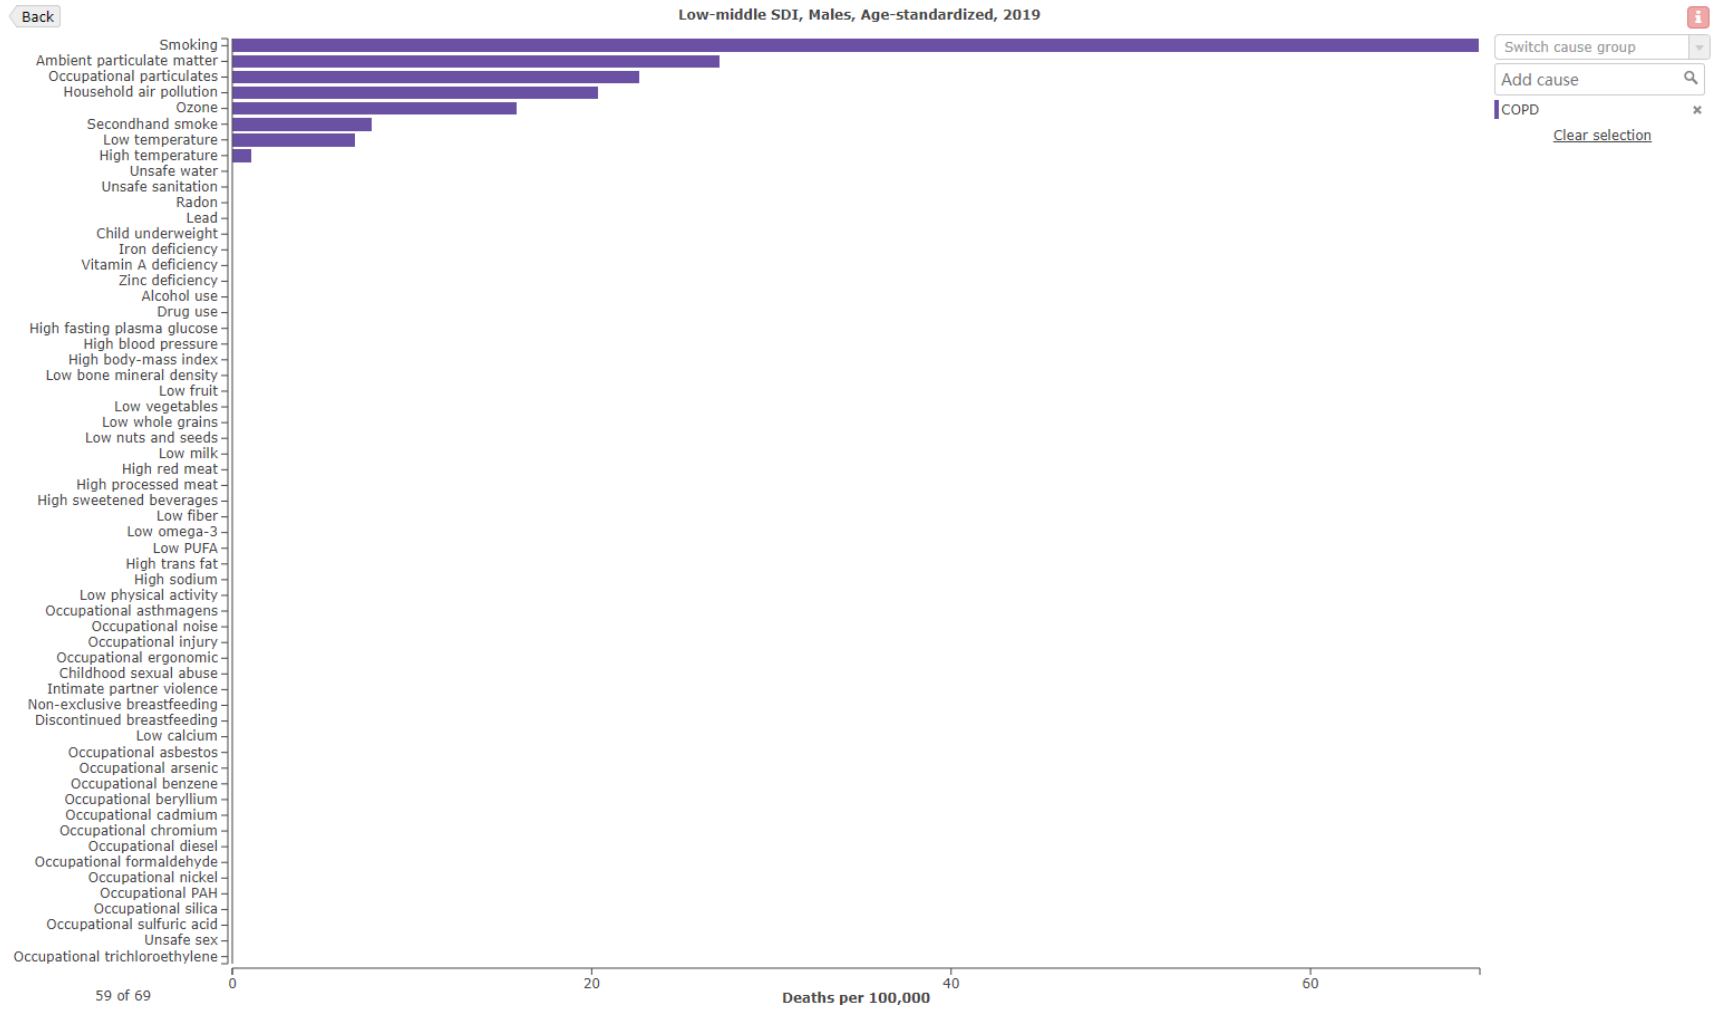

### Supplementary Figure S11F: low SDI

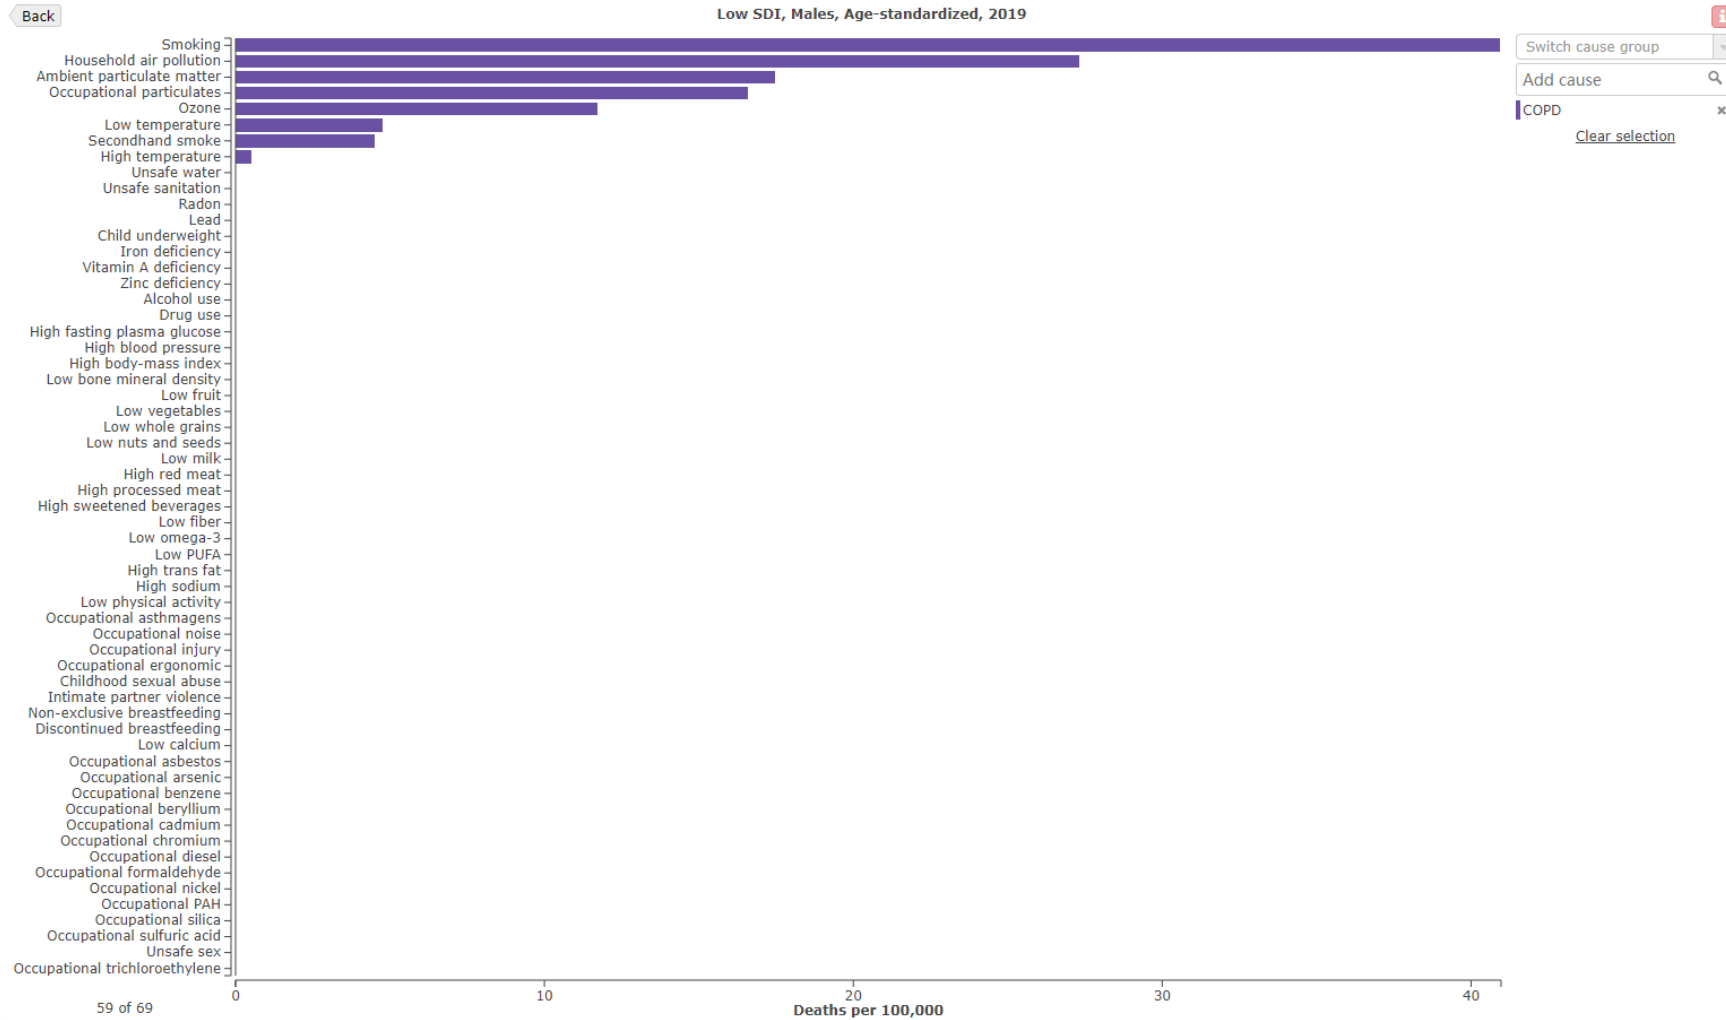

**Supplementary Figure S12** The ratio of male to female ASDR among different age groups in global (A), high SDI (B), high-middle SDI (C), middle SDI (D), middle-low SDI (E) and low SDI (F).

**Note:** SDI, socio-demographic index. ASDR, age-standardized death rate.

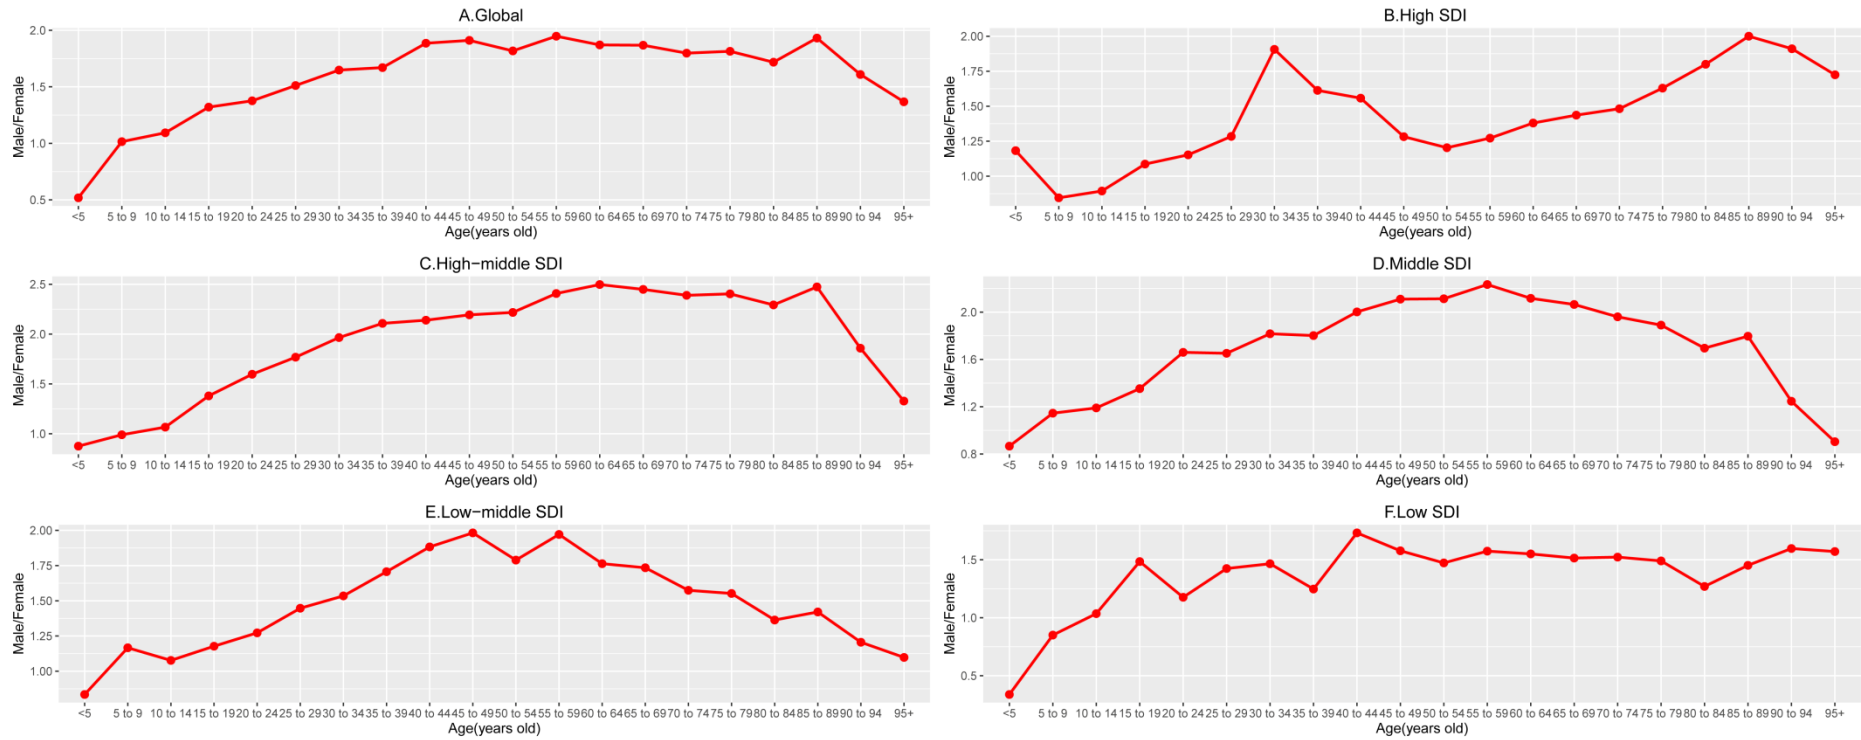





**Supplementary Figure S13** Causes of DALYs risk for Female in global (A), high SDI (B), high-middle SDI (C), middle SDI (D), middle-low SDI (E) and low SDI (F).

**Note:** SDI, socio-demographic index.

**Supplementary Figure S13A:** global

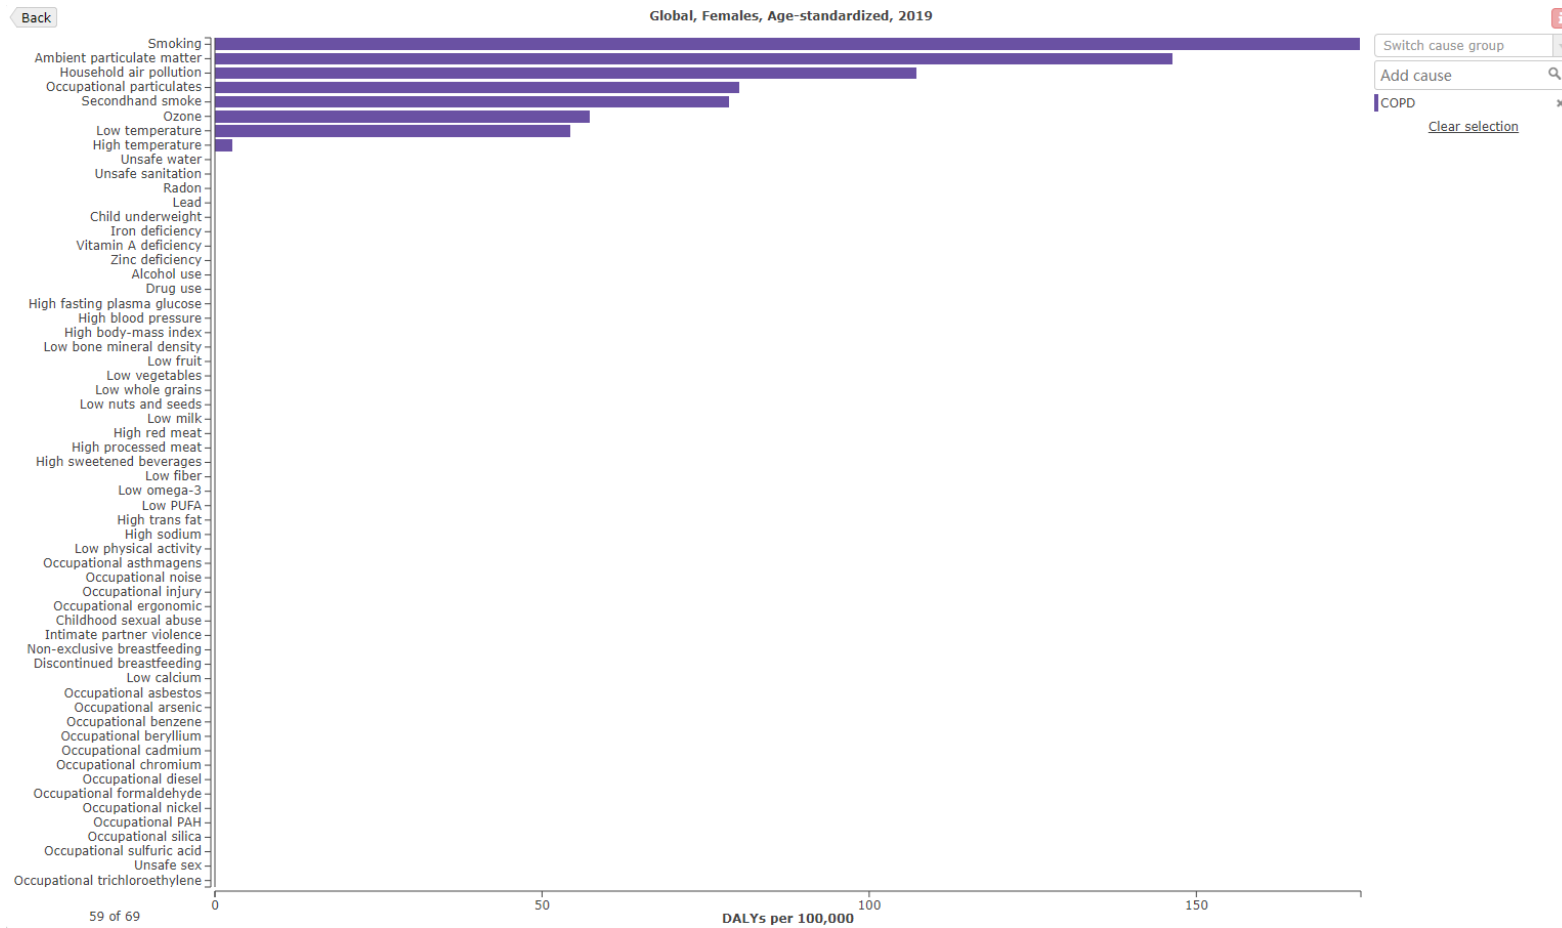

# Supplementary Figure S13B: high SDI

Back

High SDI, Females, Age-standardized, 2019

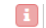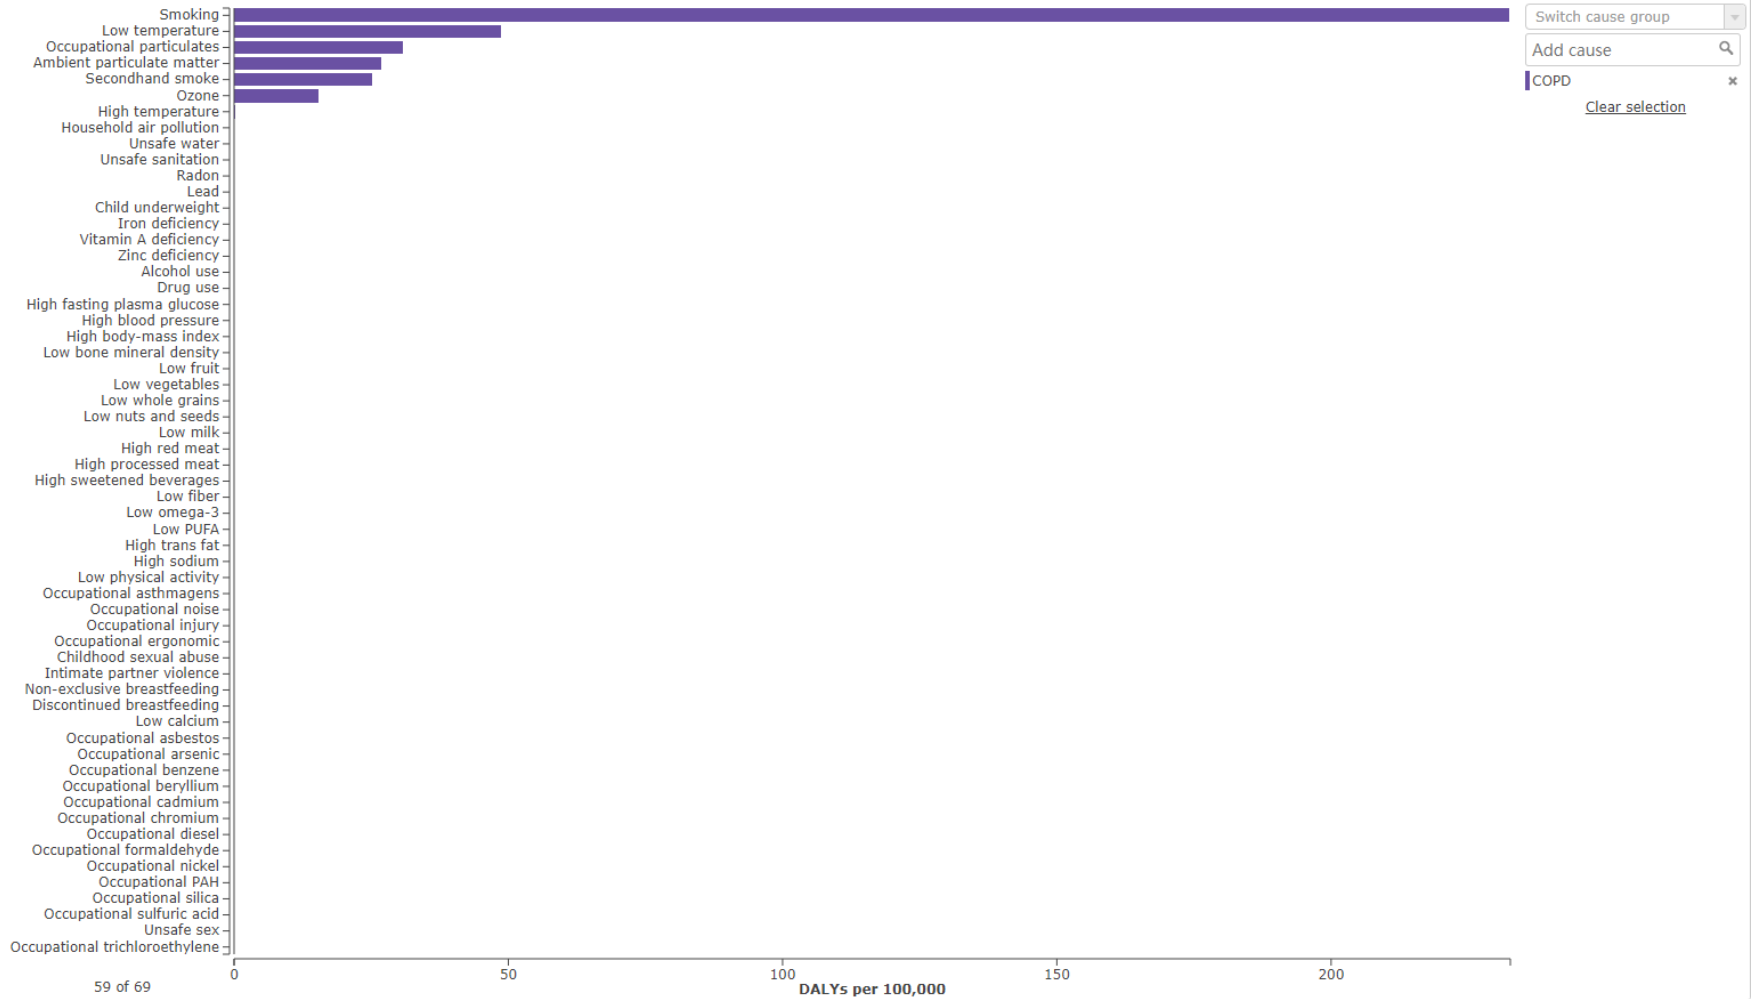

Switch cause group

Add cause

COPD

[Clear selection](#)

### Supplementary Figure S13C: high-middle SDI

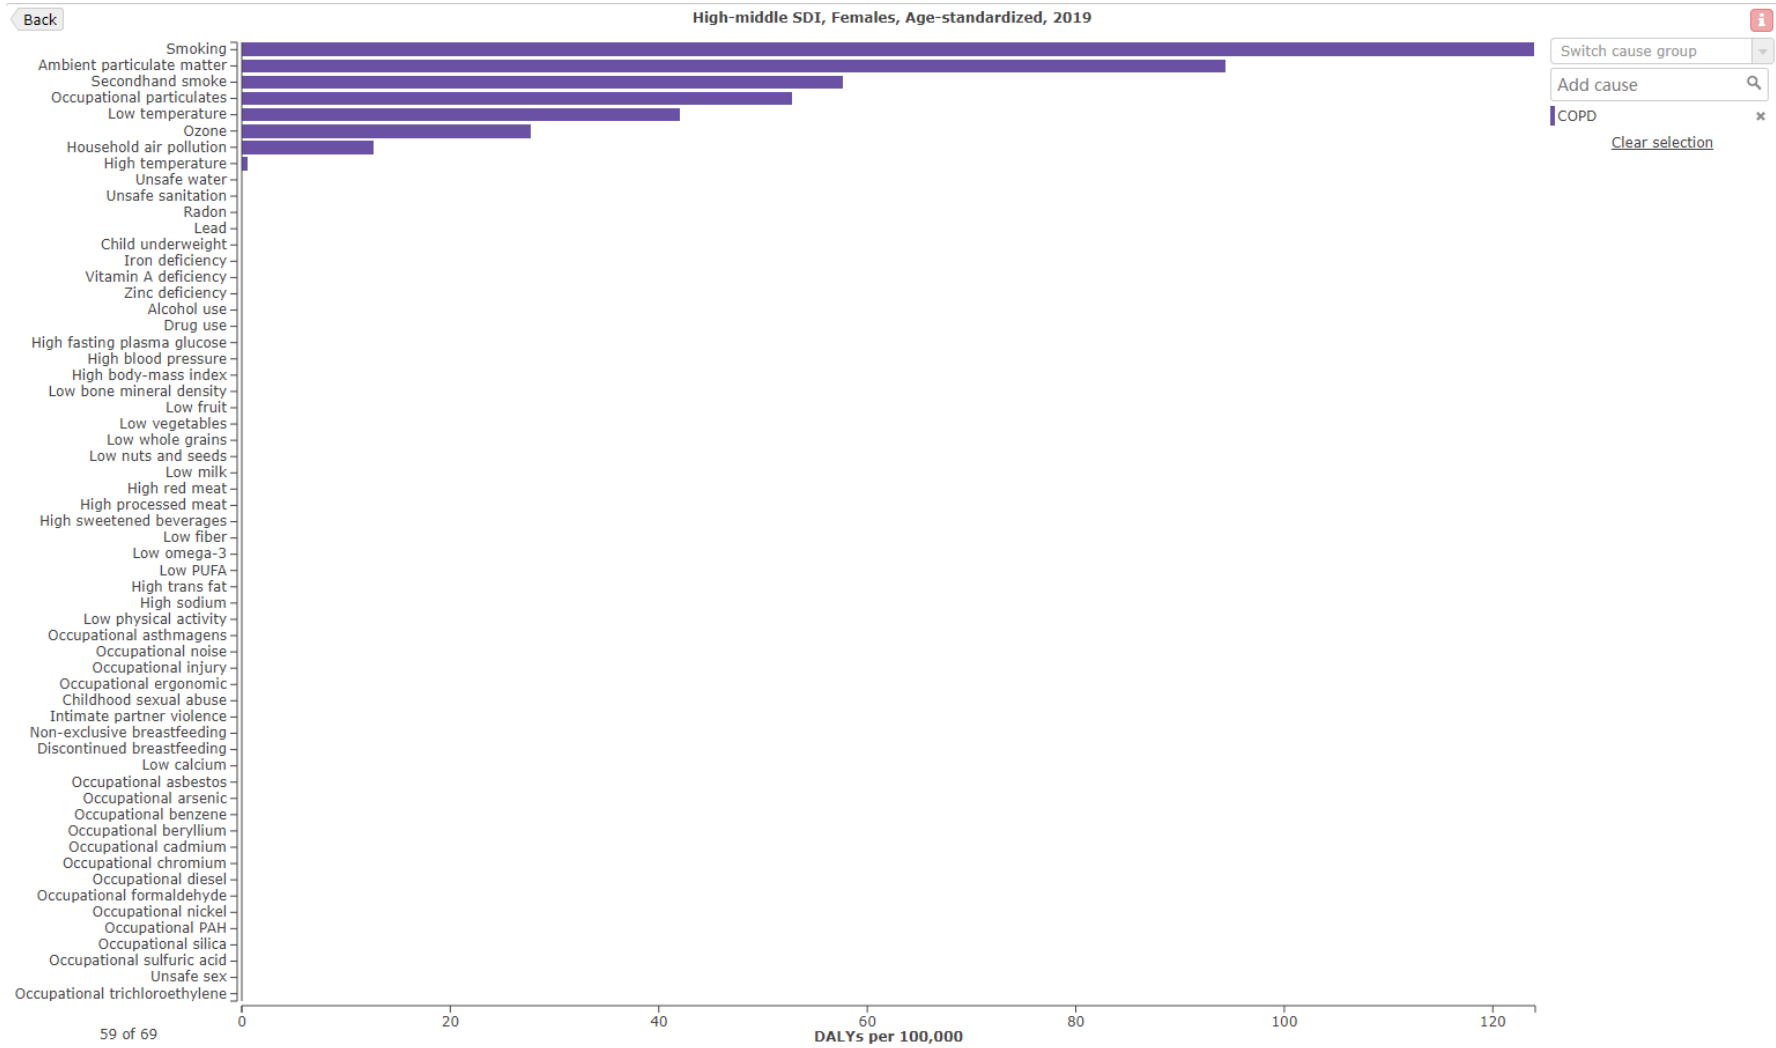

### Supplementary Figure S13D: middle SDI

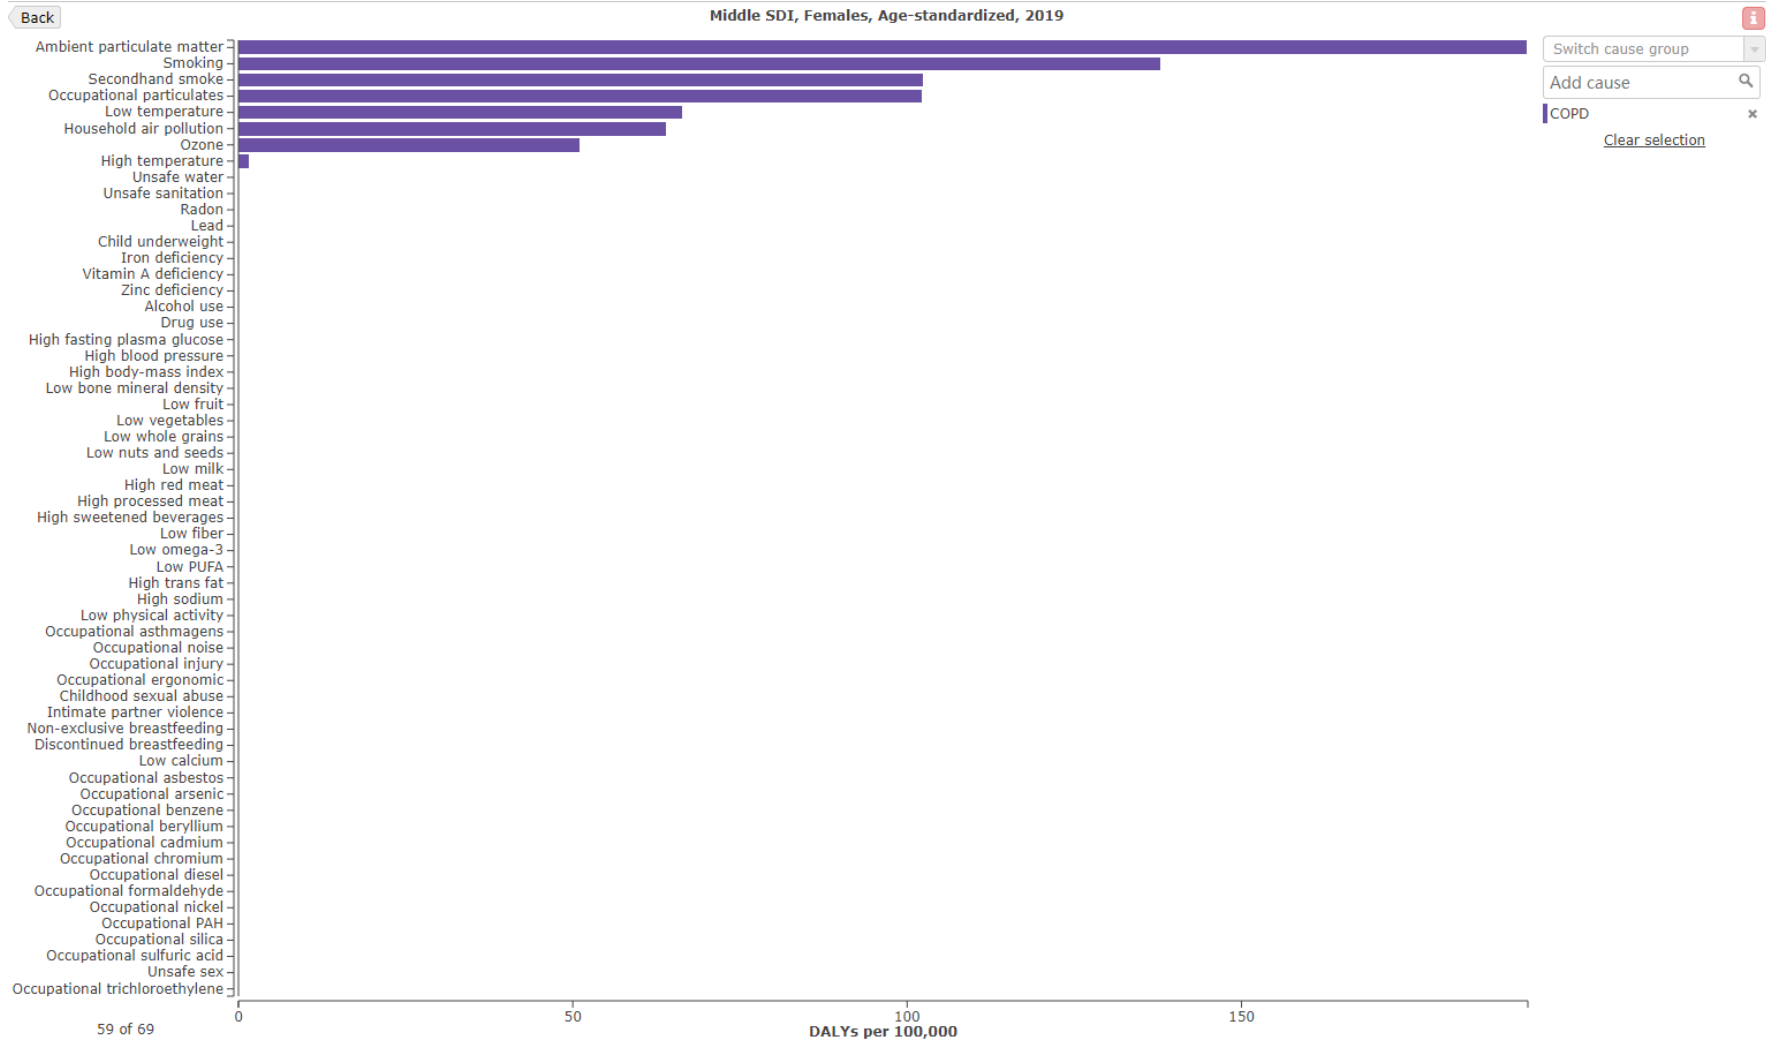

### Supplementary Figure S13E: middle-low SDI

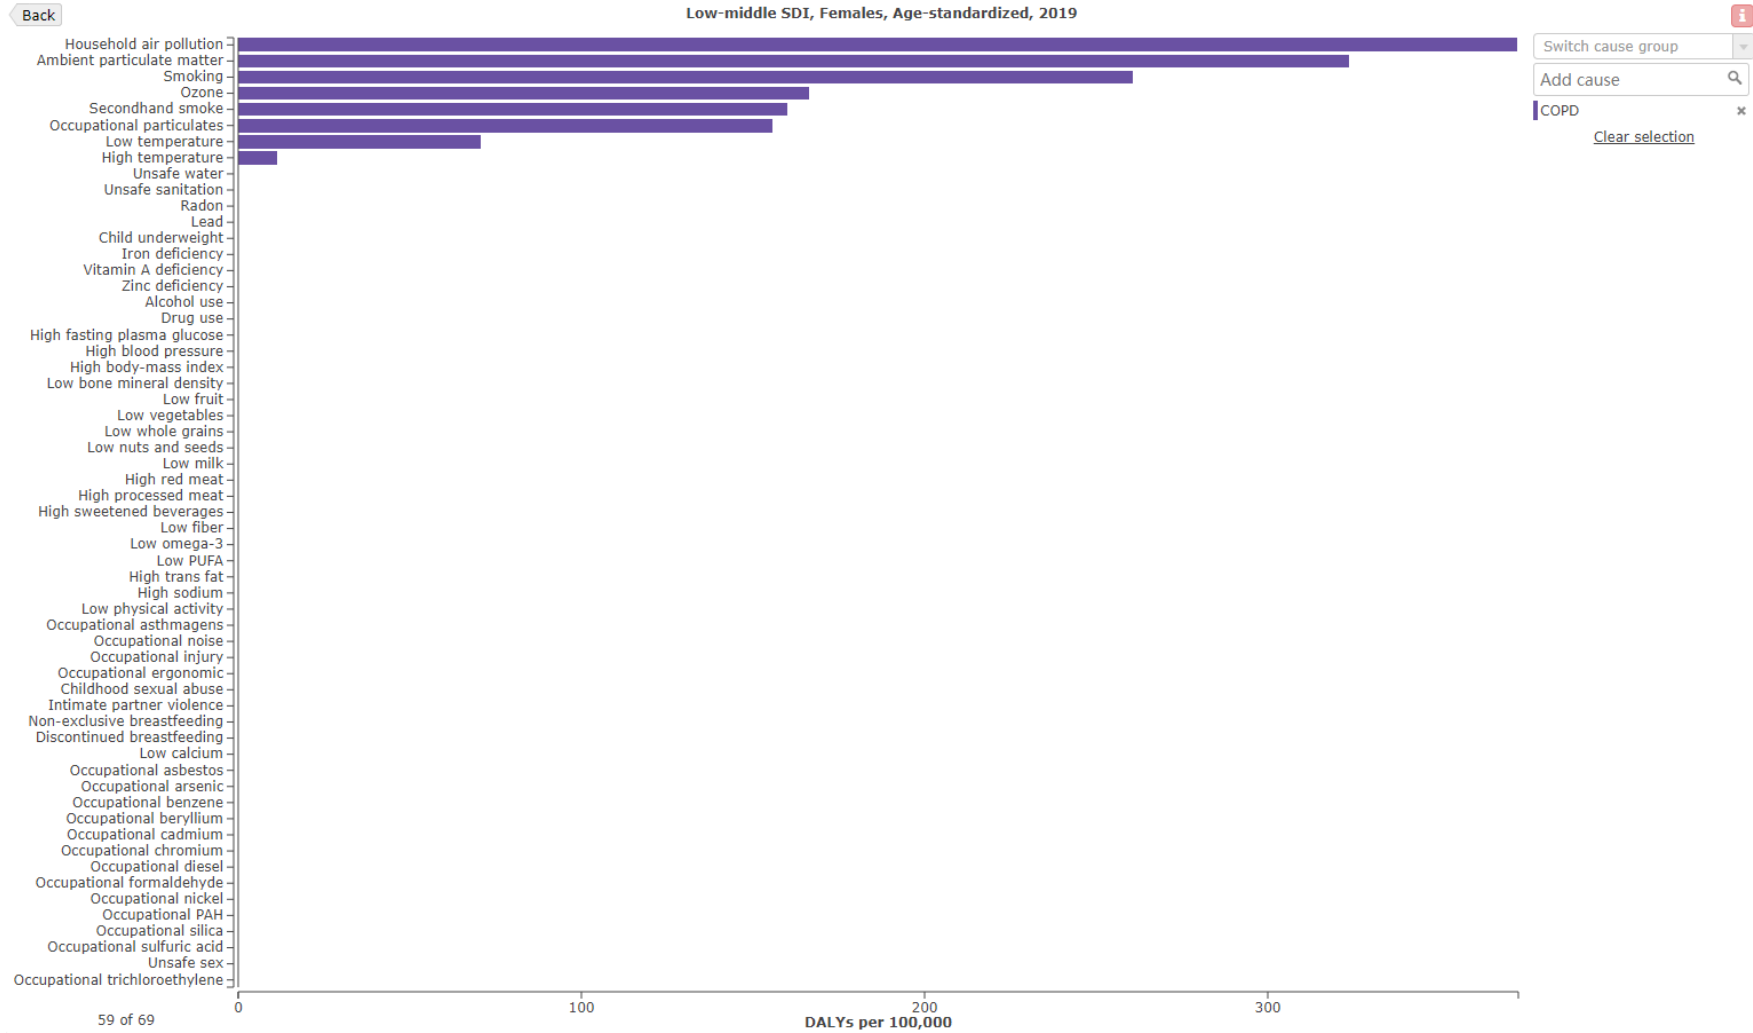

### Supplementary Figure S13F: low SDI

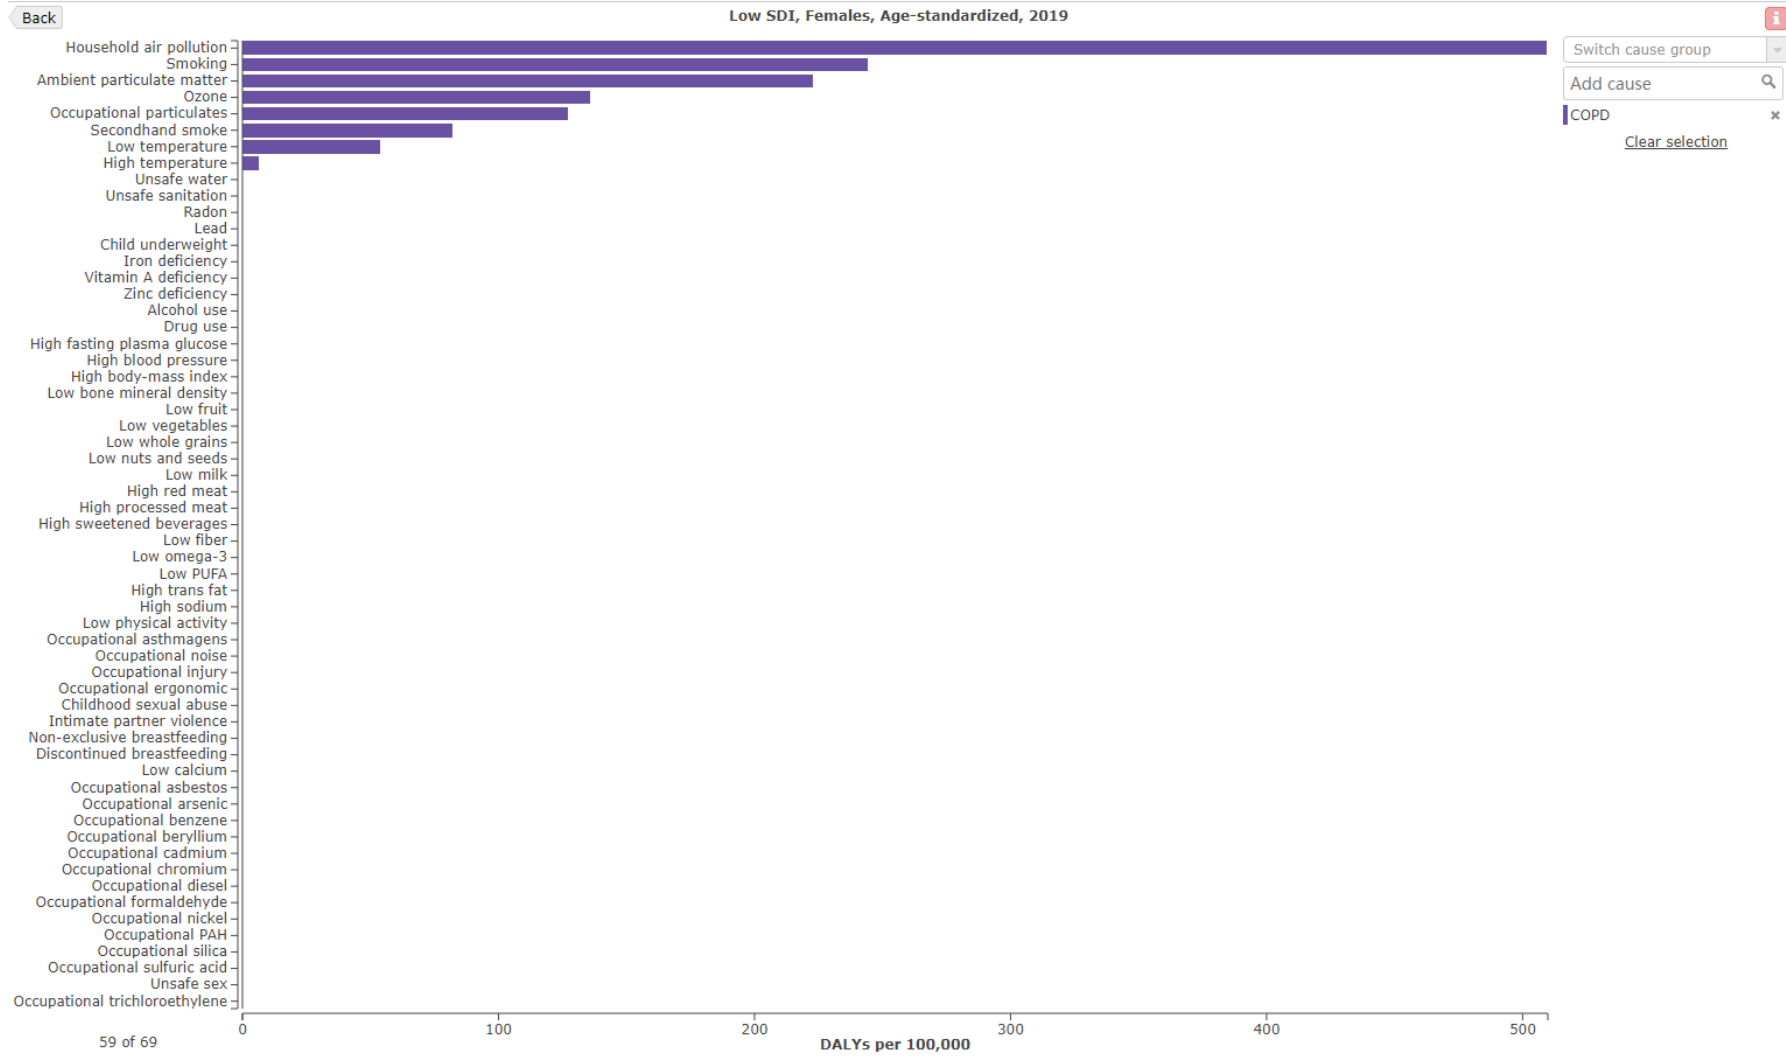

**Supplementary Figure S14** Causes of DALYs risk for male in global (A), high SDI (B), high-middle SDI (C), middle SDI (D), middle-low SDI (E) and low SDI (F).

**Note:** SDI, socio-demographic index.

**Supplementary Figure S14A:** global

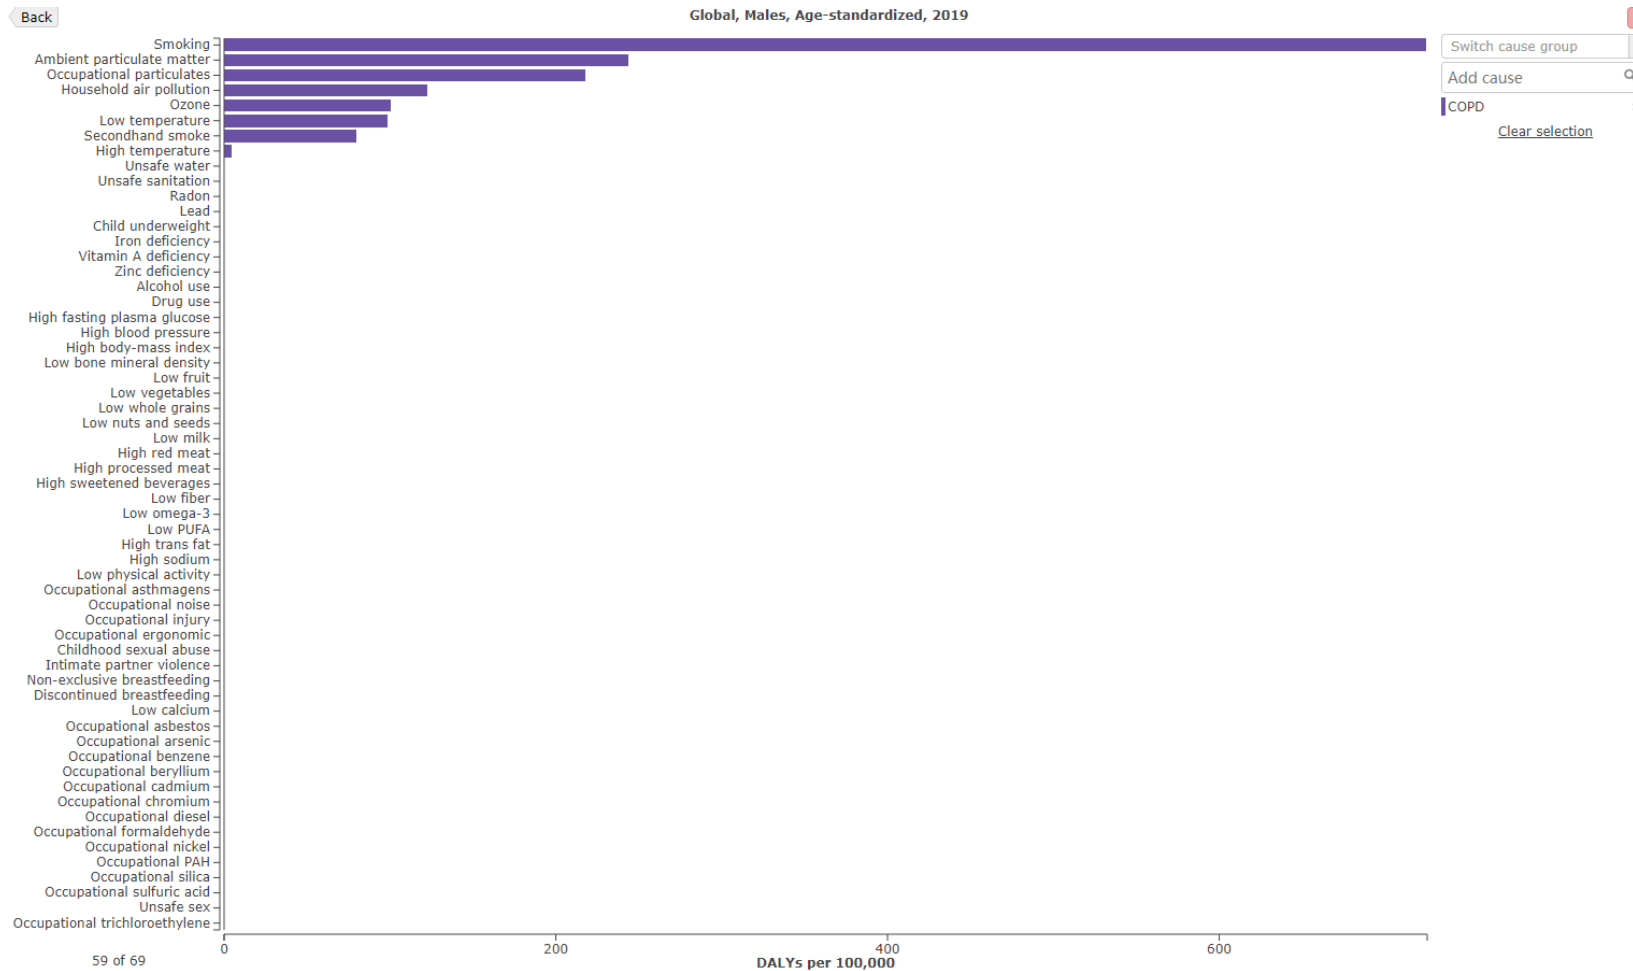

## Supplementary Figure S14B: high SDI

Back

High SDI, Males, Age-standardized, 2019

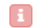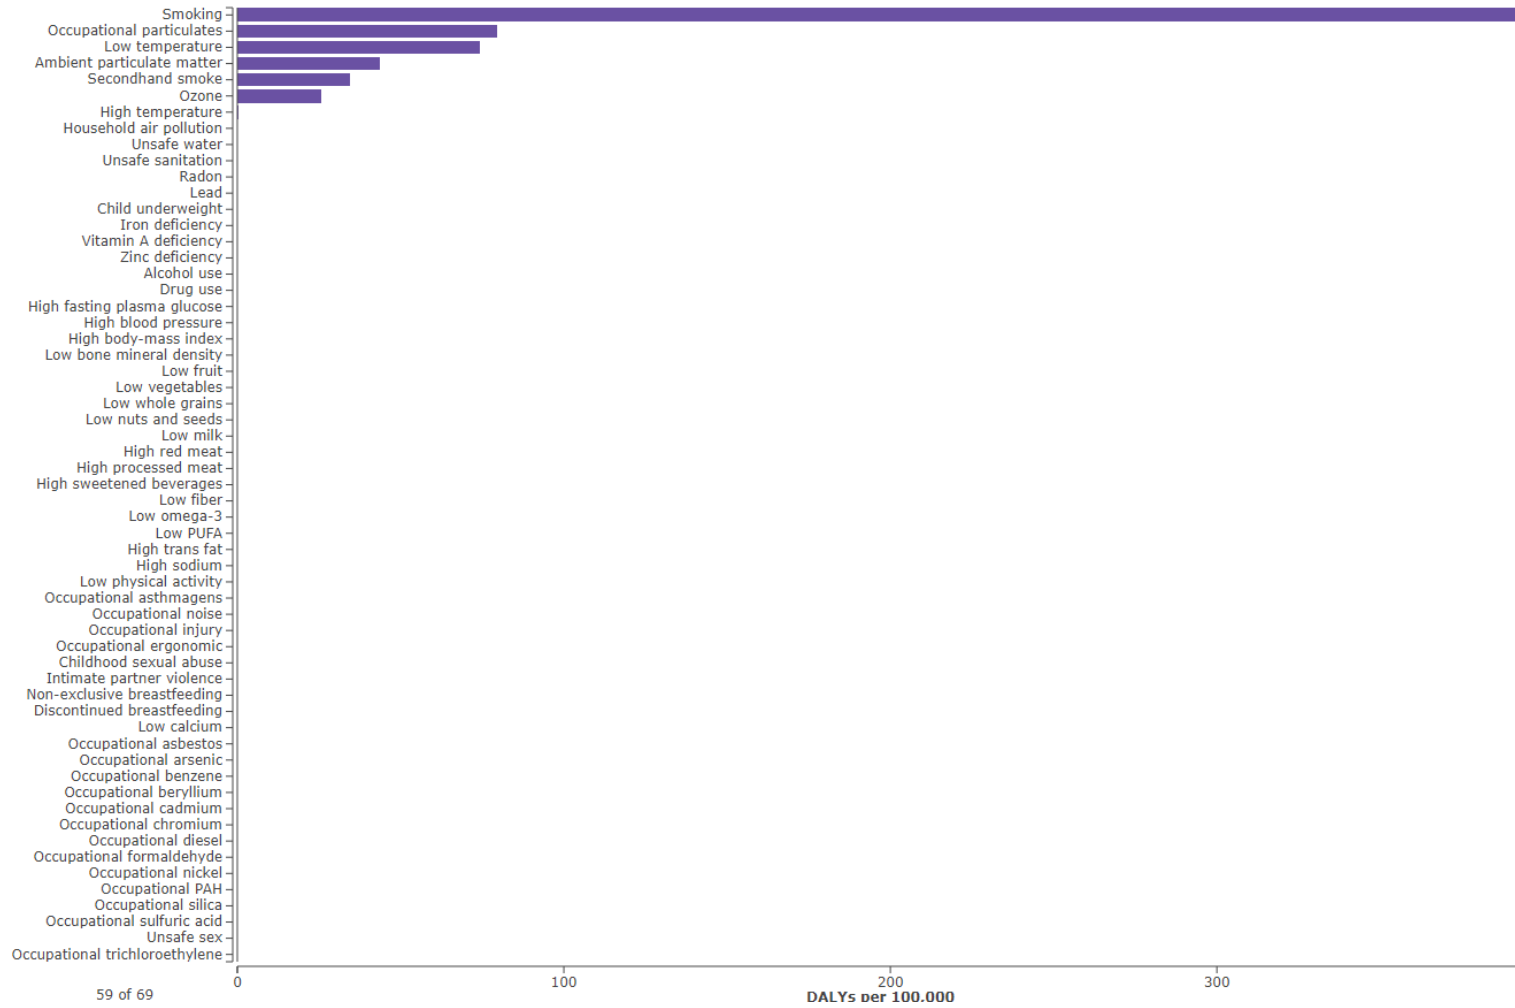

Switch cause group

Add cause

COPD \*

[Clear selection](#)



### Supplementary Figure S14C: high-middle SDI

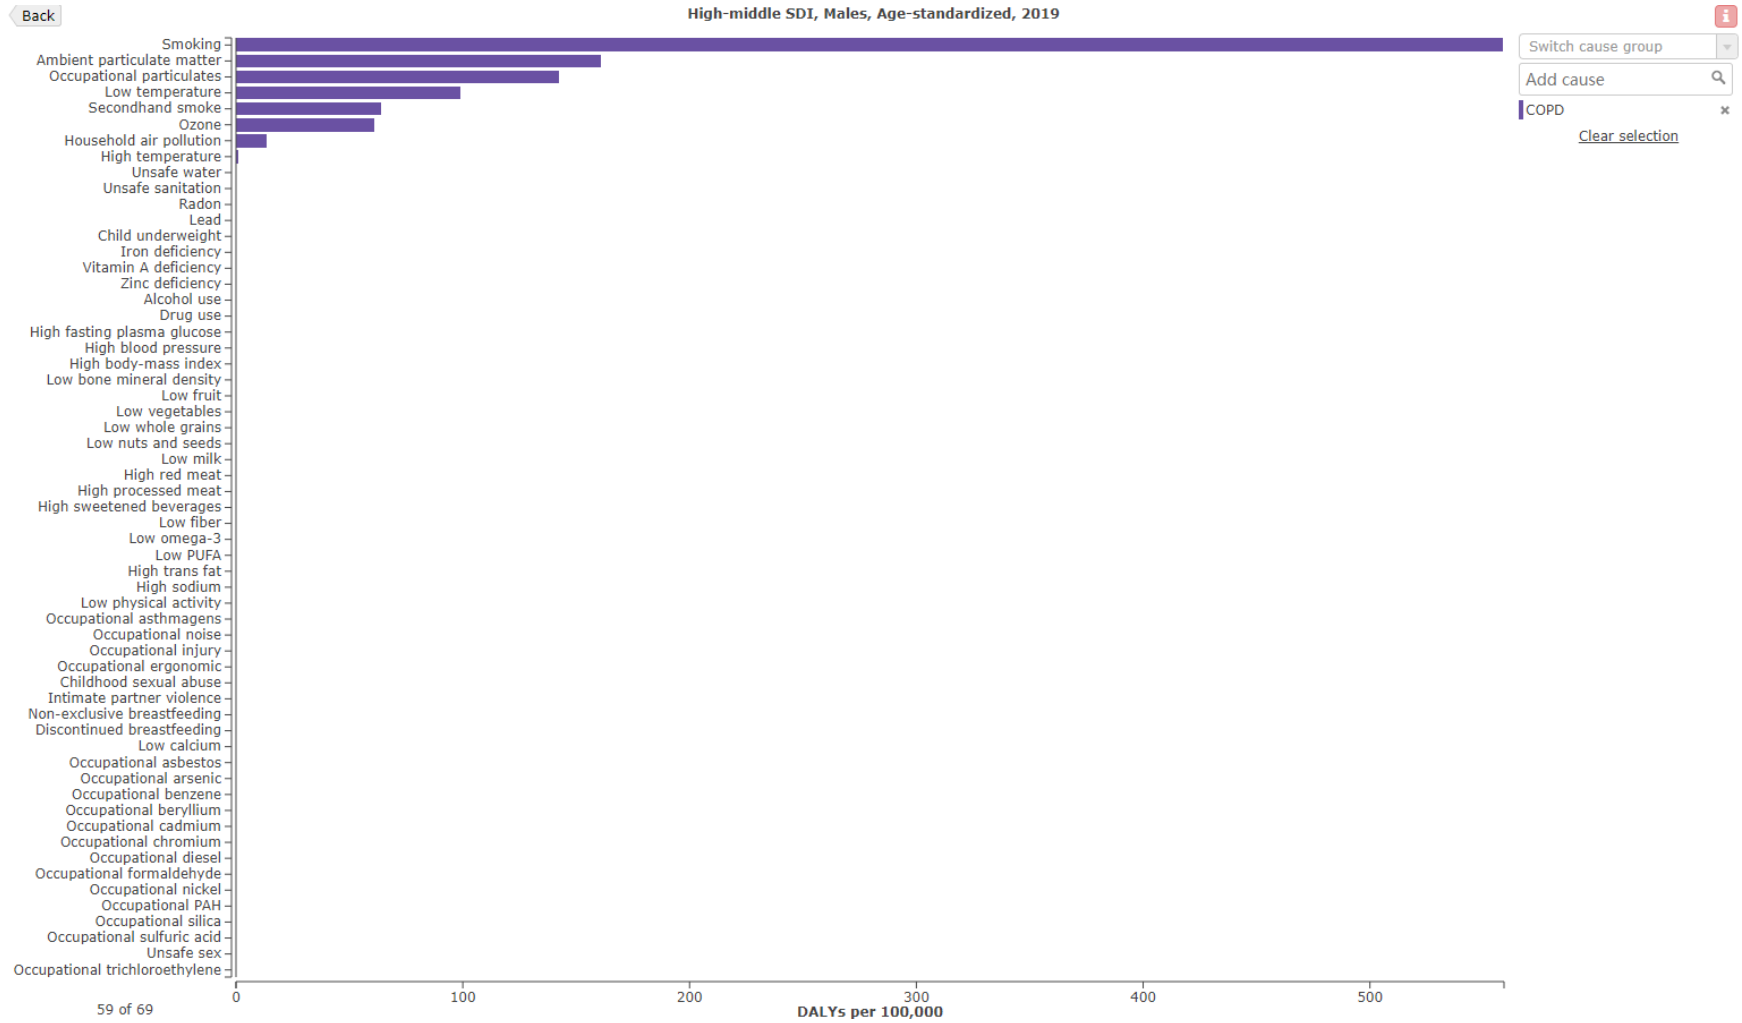

### Supplementary Figure S14D: middle SDI

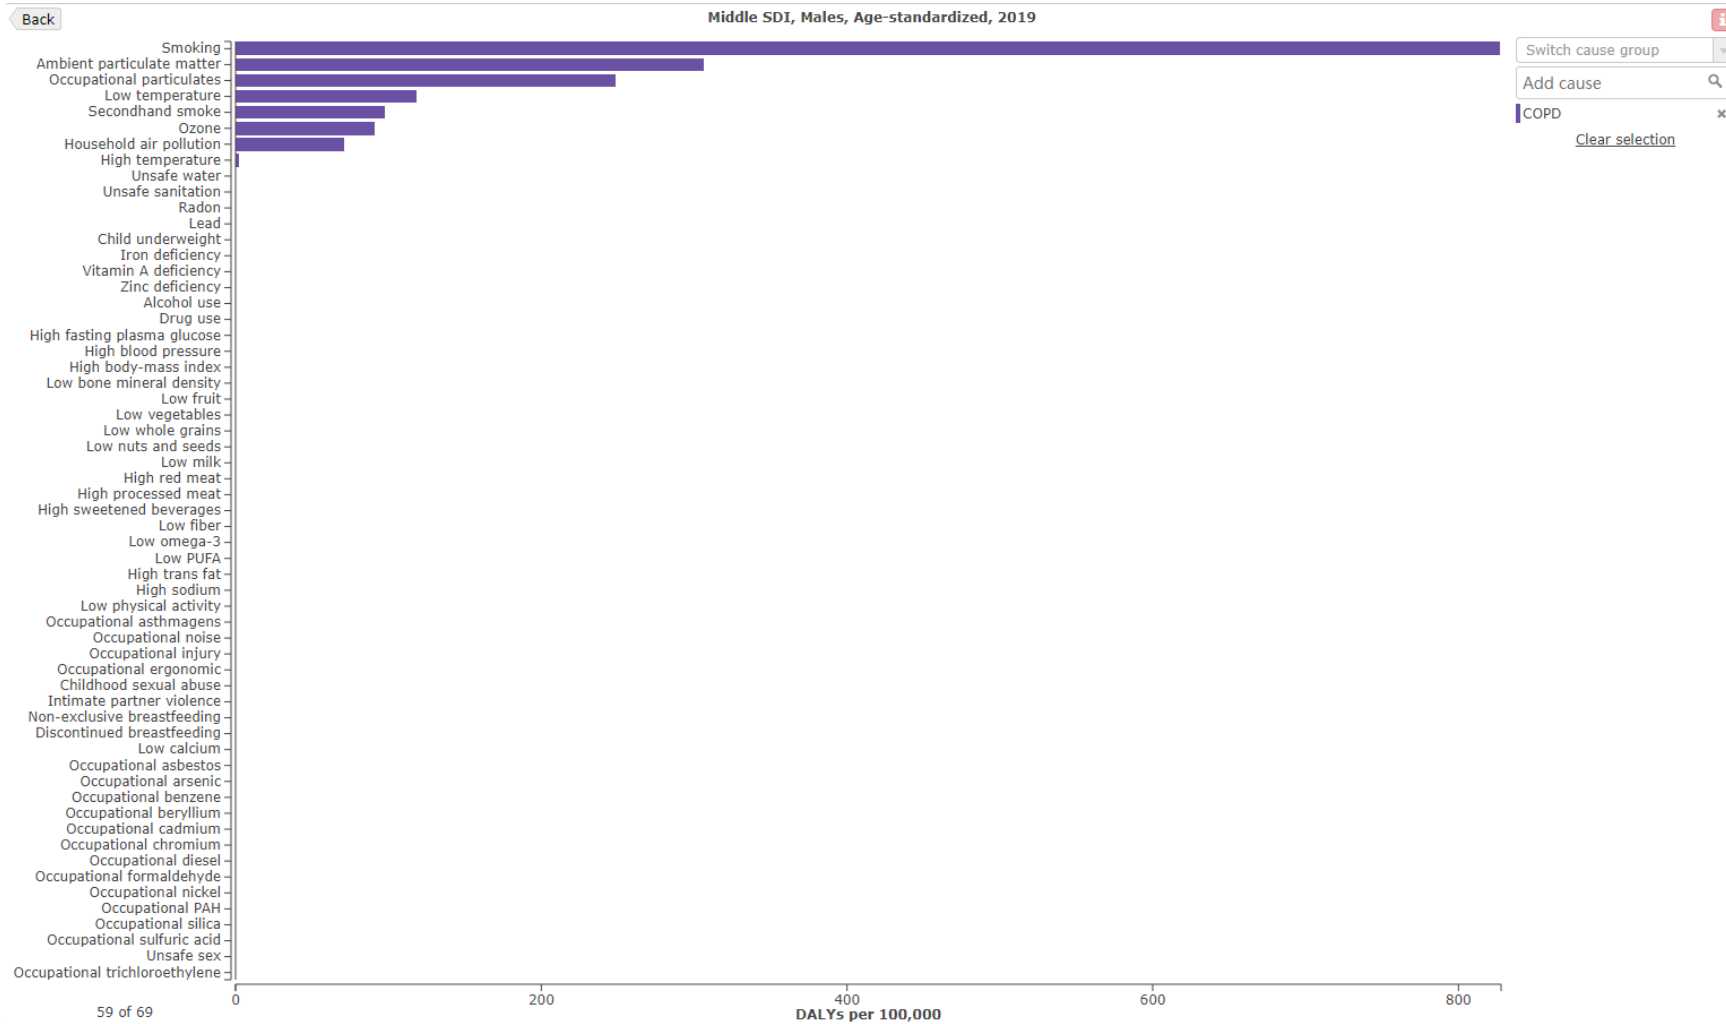

### Supplementary Figure S14E: middle-low SDI

Back

Low-middle SDI, Males, Age-standardized, 2019

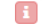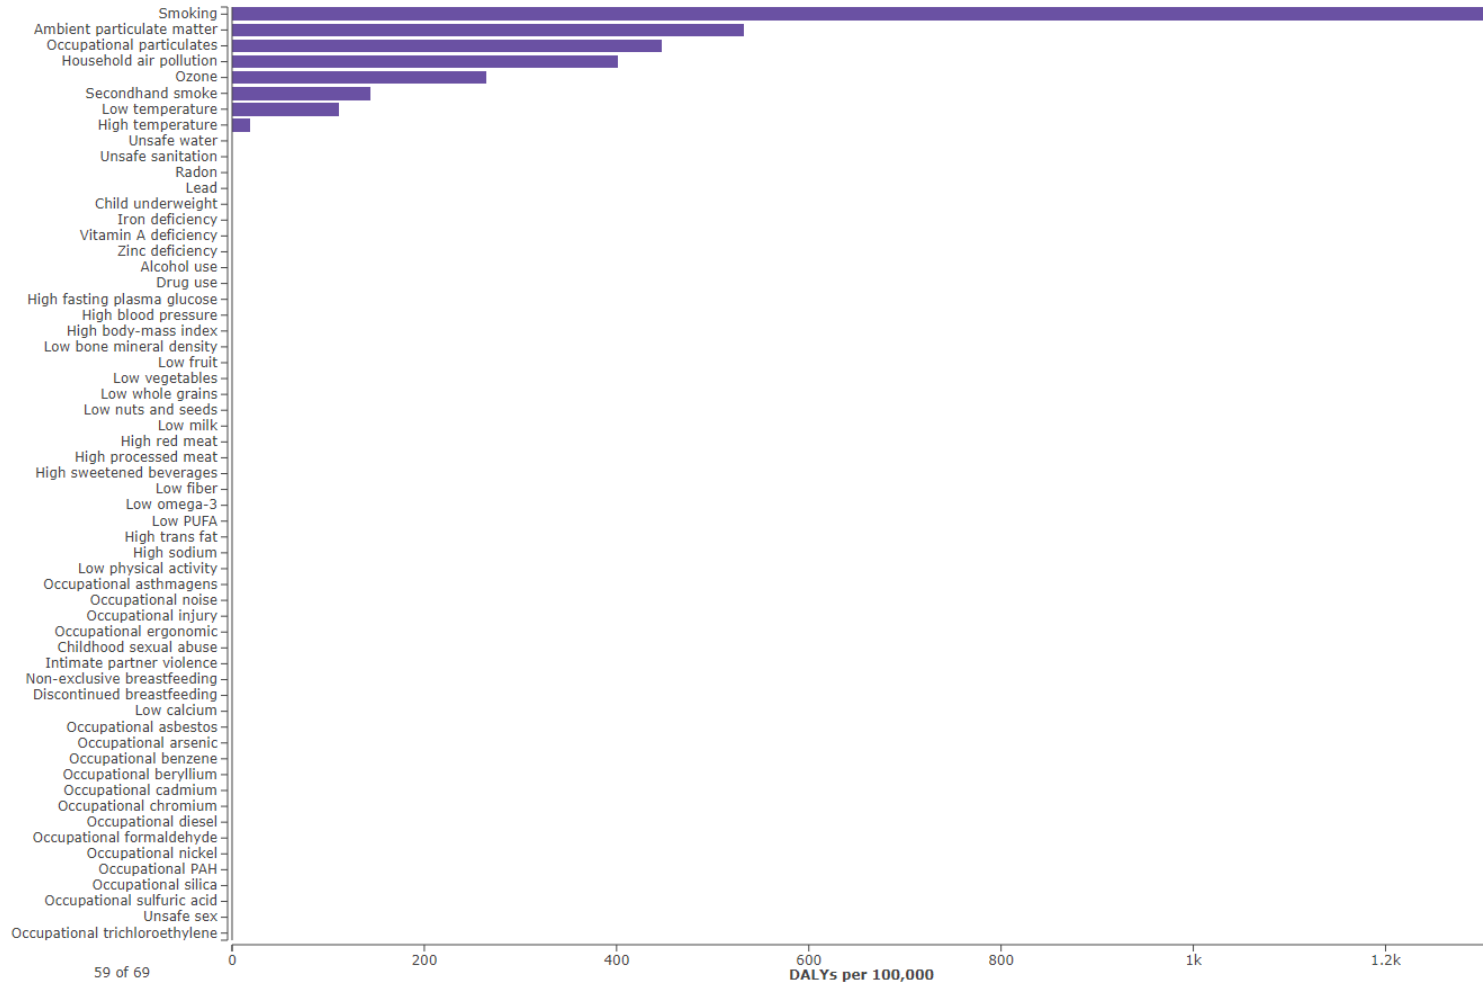

Switch cause group

Add cause

COPD

Clear selection

# Supplementary Figure S14F: low SDI

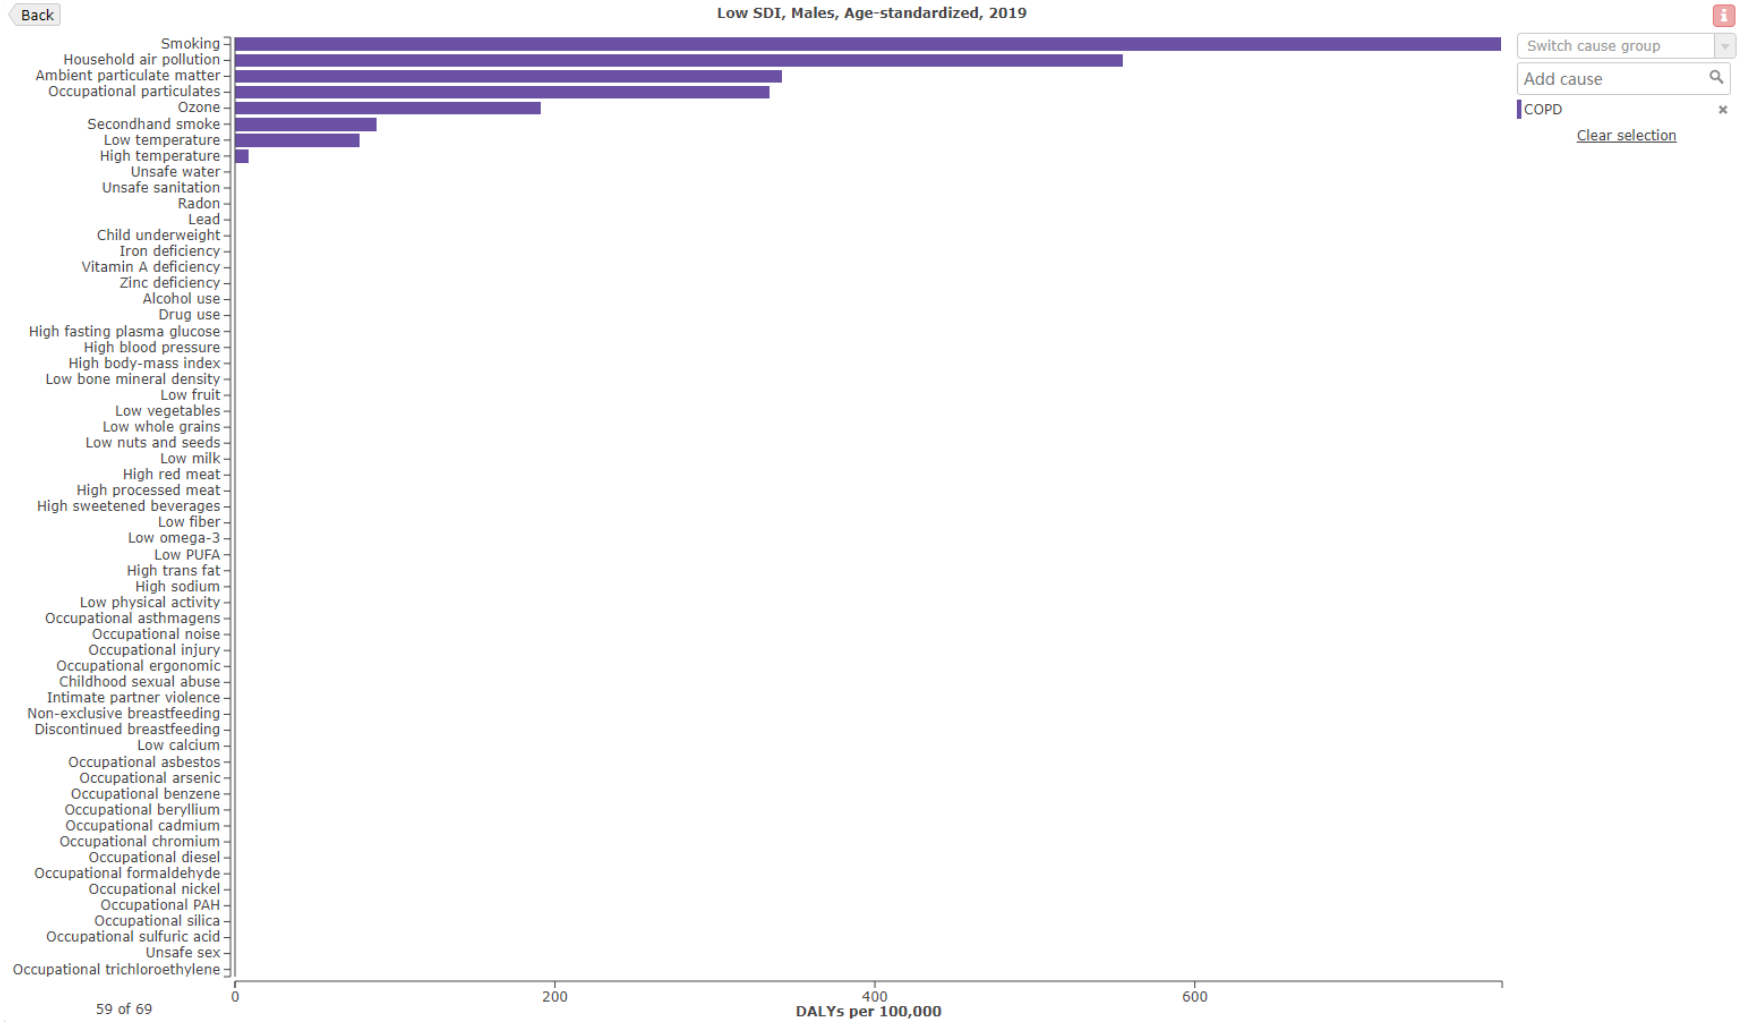

**Supplementary Figure S15** The incidence, death, and DALY rates of Chronic Obstructive Pulmonary Disease in different age groups.

**Note:** A: Incidence in 1990. B: Incidence in 2019. C: Death rate in 1990. D: Death rate in 2019. E: DALY rate in 1990. F: DALY rate in 2019.

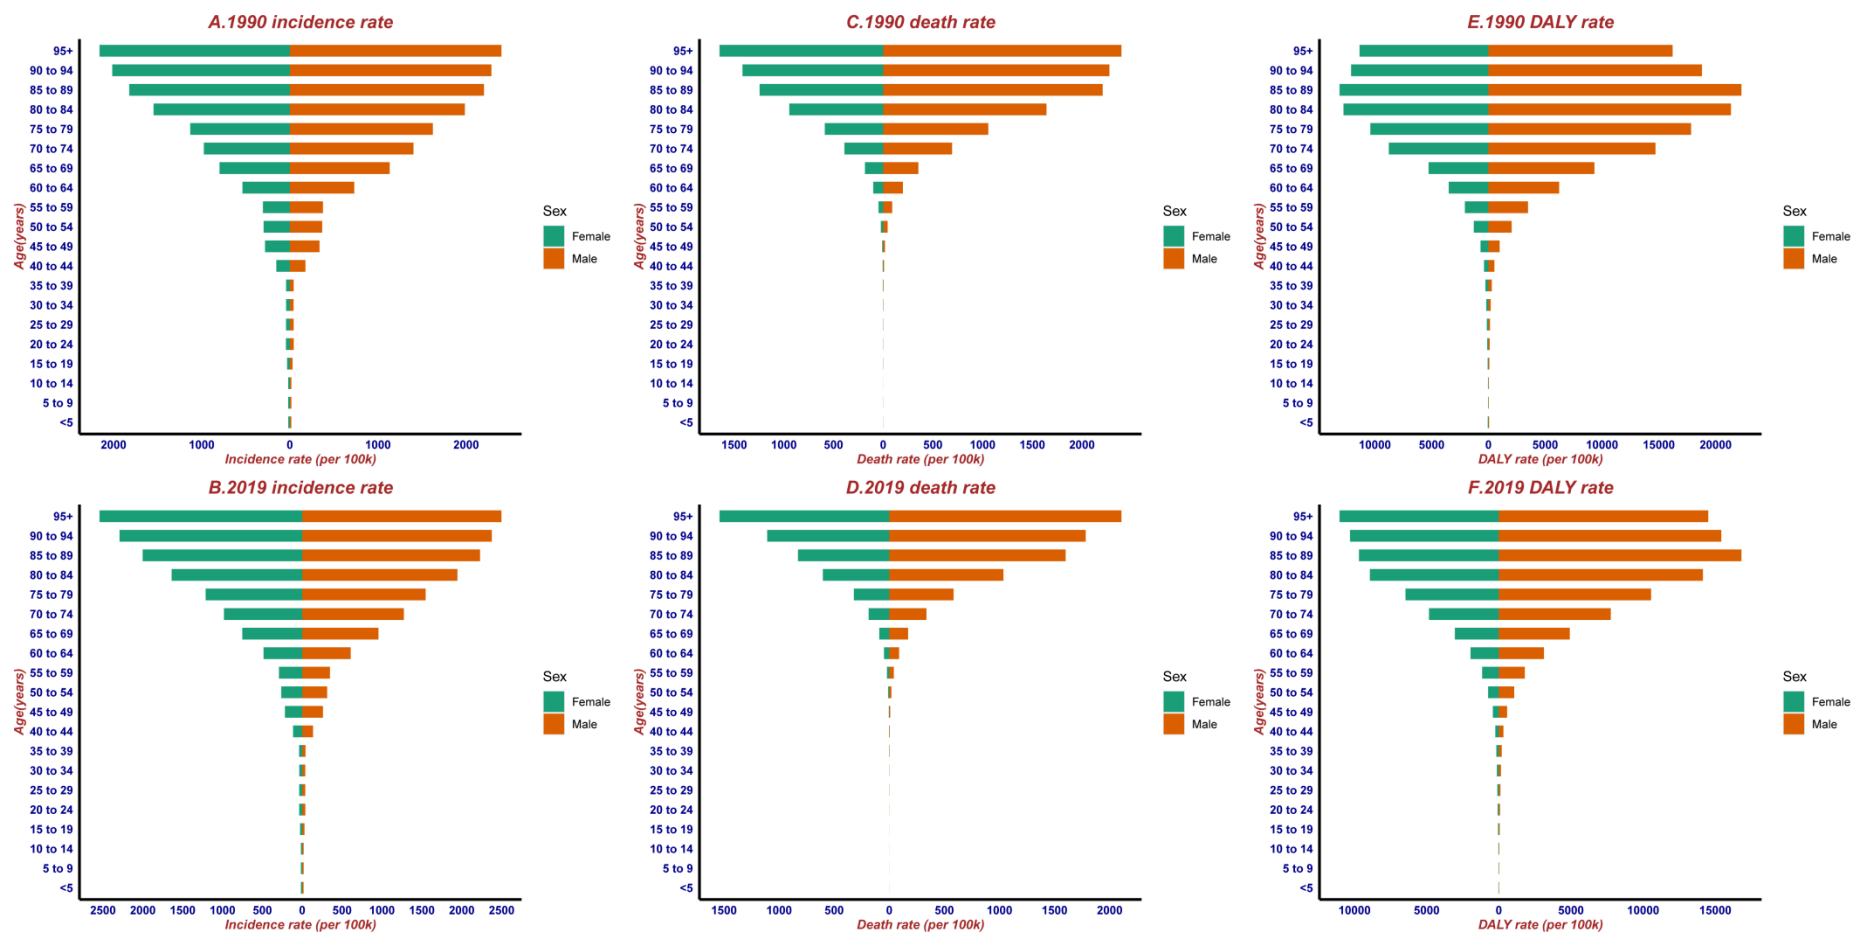

**Supplementary Figure S16** The ratio of male to female age-standardized DALY rate among different age groups in global (A), high SDI (B), high-middle SDI (C), middle SDI (D), middle-low SDI (E) and low SDI (F).

**Note:** SDI, socio-demographic index.

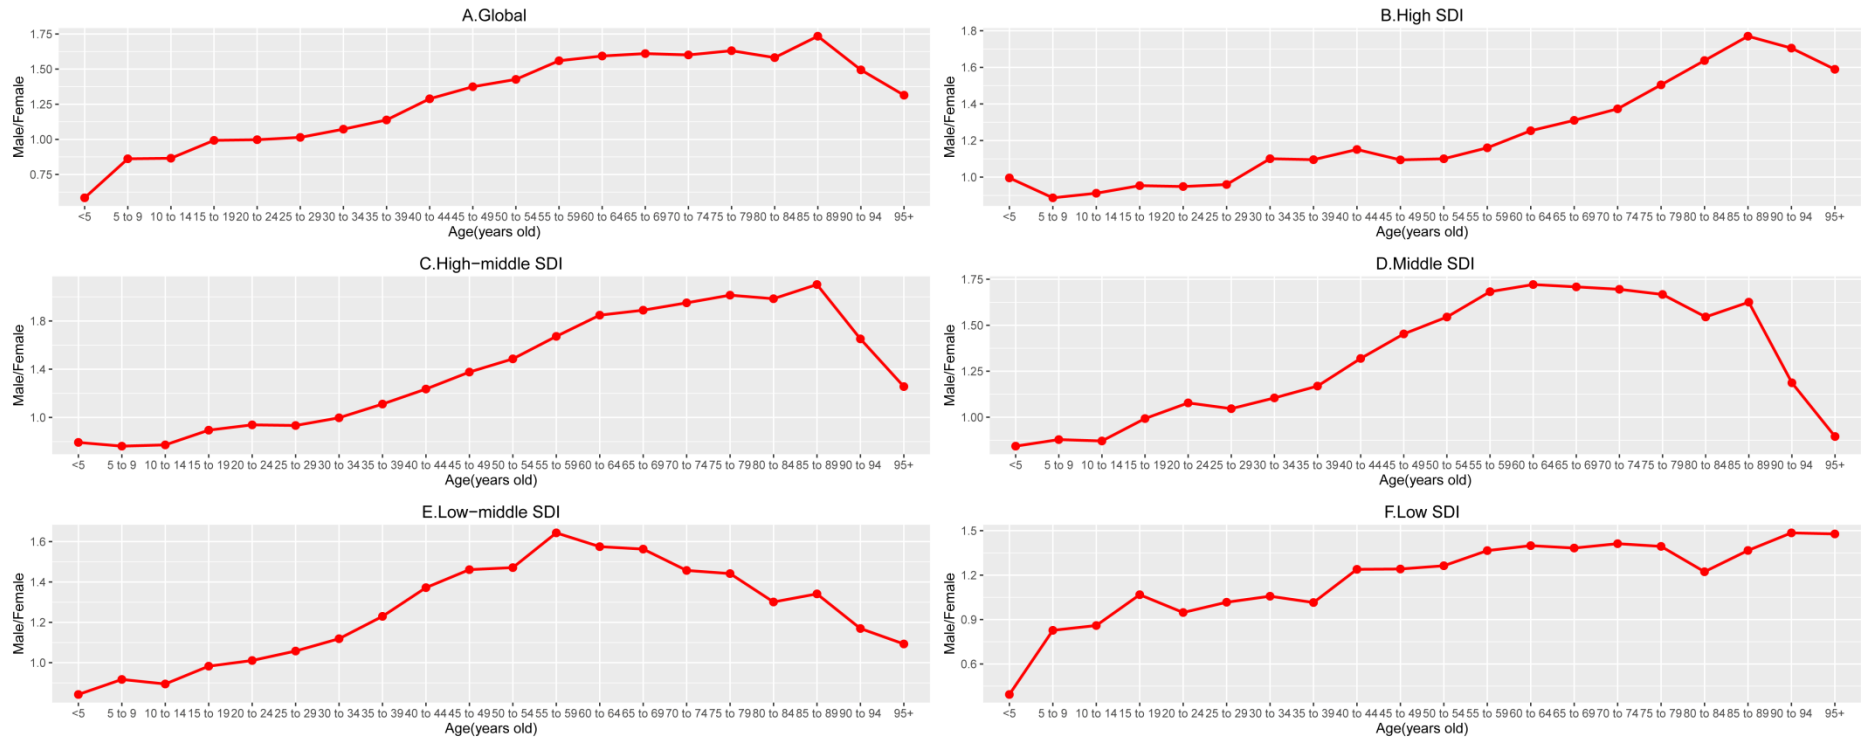

Supplement: RESP-28-29-s001.pdf [file RESP-28-29-s001.pdf]
